1 **Classification:** Biological Sciences

2 **Mechanosensitive calcium signaling in filopodia**

3 Artem K. Efremov<sup>1,#,\*</sup>, Mingxi Yao<sup>1,#</sup>, Michael P. Sheetz<sup>1,2</sup>, Alexander D.  
4 Bershadsky<sup>1,3</sup>, Boris Martinac<sup>4</sup> and Jie Yan<sup>1,5,\*</sup>

5 <sup>1</sup>Mechanobiology Institute, National University of Singapore, Singapore 117411,  
6 Singapore.

7 <sup>2</sup>Department of Biological Sciences, Columbia University, New York, New York 10027,  
8 USA.

9 <sup>3</sup>Weizmann Institute of Science, Rehovot, 7610001, Israel.

10 <sup>4</sup>Victor Chang Cardiac Research Institute, Sydney, New South Wales 2010, Australia.

11 <sup>5</sup>Department of Physics, National University of Singapore, Singapore 117551,  
12 Singapore.

13 <sup>#</sup>These authors equally contributed to the study

14 <sup>\*</sup>Correspondence and requests for materials should be addressed to: A.K.E. (e-mail:  
15 [mbiay@nus.edu.sg](mailto:mbiay@nus.edu.sg)) and J.Y. (e-mail: [phyyj@nus.edu.sg](mailto:phyyj@nus.edu.sg)).

16

17 **Abstract**

18 Filopodia are ubiquitous membrane projections that play crucial role in guiding cell  
19 migration on rigid substrates and through extracellular matrix by utilizing yet unknown  
20 mechanosensing molecular pathways. As recent studies show that Ca<sup>2+</sup> channels  
21 localized to filopodia play an important role in regulation of their formation and since  
22 some Ca<sup>2+</sup> channels are known to possess mechanosensing properties, activity of  
23 filopodial Ca<sup>2+</sup> channels might be tightly interlinked with the filopodia mechanosensing  
24 function. We tested this hypothesis by monitoring changes in the intra-filopodial Ca<sup>2+</sup>  
25 level in response to application of stretching force to individual filopodia of several cell  
26 types. It has been found that stretching forces of tens of pN strongly promote Ca<sup>2+</sup> influx  
27 into filopodia, causing persistent Ca<sup>2+</sup> oscillations that last for minutes even after the  
28 force is released. Most of the known mechanosensitive Ca<sup>2+</sup> channels, such as Piezo 1,  
29 Piezo 2 and TRPV4, were found to be dispensable for the observed force-dependent  
30 Ca<sup>2+</sup> influx. In contrast, L-type Ca<sup>2+</sup> channels appear to be a key component in the  
31 discovered phenomenon. Since previous studies have shown that intra-filopodial  
32 transient Ca<sup>2+</sup> signals play an important role in guidance of cell migration, our results  
33 suggest that the force-dependent activation of L-type Ca<sup>2+</sup> channels may contribute to  
34 this process. Overall, our study reveals an intricate interplay between mechanical forces  
35 and Ca<sup>2+</sup> signaling in filopodia, providing novel mechanistic insights for the force-  
36 dependent filopodia functions in guidance of cell migration.

37 **Keywords:** filopodia, mechanosensing, L-type calcium channels, calcium signaling,  
38 optical tweezers

39

#### 40 **Significance statement**

41 We found that tensile forces of tens of pN applied to individual filopodia trigger  $\text{Ca}^{2+}$   
42 influx through L-type  $\text{Ca}^{2+}$  channels, producing persistent  $\text{Ca}^{2+}$  oscillations inside  
43 mechanically stretched filopodia. Resulting elevation of the intra-filopodial  $\text{Ca}^{2+}$  level  
44 in turn leads to downstream activation of calpain protease, which is known to play a  
45 crucial role in regulation of the cell adhesion dynamics. Thus, our work suggests that  
46 L-type channel-dependent  $\text{Ca}^{2+}$  signaling and the mechanosensing function of filopodia  
47 are coupled to each other, synergistically governing cell adhesion and motion in a force-  
48 dependent manner. Since L-type  $\text{Ca}^{2+}$  channels have been previously found in many  
49 different cell types, such as neural or cancer cells, the above mechanism is likely to be  
50 widespread among various cell lines.

51

#### 52 **Introduction**

53 The process of cell migration plays the central role in development and maintenance of  
54 multicellular organisms. Wounds healing, immune response to exogenous pathogens,  
55 embryonic tissue morphogenesis – these are just a few examples of a large number of  
56 vital biological processes that rely on highly ordered collective cell migration, which is  
57 required for proper functioning of living organisms (1-4). To guide their motion through  
58 extracellular matrix (ECM), living cells use dynamic membrane projections known as  
59 filopodia, which are responsible for mechanical and chemical sensing of the  
60 surrounding microenvironment as well as formation of initial adhesion contacts with  
61 ECM or other cells (1-5). For example, it has been recently shown that filopodia play  
62 the central role in guiding cell durotaxis, a preferential cell movement along the  
63 gradient of the substrate rigidity (6, 7). Furthermore, numerous experimental studies  
64 suggest that abnormally high filopodia activity is a typical feature of aggressive cancer  
65 cells that results in their high motility, leading to metastases (3). Thus, understanding  
66 molecular mechanisms that regulate filopodia dynamics and adhesion may provide  
67 important insights into the cell migration process and its alteration during neoplastic  
68 development.

69 Recently, several proteins necessary for filopodia formation, growth and adhesion  
70 have been identified. Filopodia are actin-rich membrane extensions of  $\sim 2\text{-}40\ \mu\text{m}$  in  
71 length that were shown to contain a bundle ( $\sim 12\text{-}20$ ) of parallel actin filaments cross-  
72 linked with each other by fascin proteins (2, 3, 5, 8-10). Polymerization of these  
73 filaments is carried out by synergistic cooperation between formins [mDia1,2 (11, 12)  
74 and FMNL2,3 (13-15)] and actin uncapping Ena/VASP proteins (16-18), which  
75 localize to the dynamic ends of the actin filaments at the filopodia tips. Filopodia  
76 adhesion to ECM is mediated by integrin molecules, which can be linked to actin

77 filaments via talin proteins (19, 20). Talins in addition have binding sites for RIAM  
78 proteins that provide connection to VASP/profilin complexes, promoting  
79 polymerization of actin filaments (20-22). Furthermore, filopodia also contain actin-  
80 based molecular motors, such as myosin X, which facilitates filopodia formation, and  
81 promotes activation and/or transportation of integrin and VASP proteins (23-27), see  
82 schematic Figure 1A showing the main filopodial components.

83 Although the major proteins contributing to the filopodia formation, growth and  
84 adhesion have been identified, there is still a large gap in understanding of how their  
85 emergent collective behaviour results in the filopodia's ability to guide cell migration.  
86 Specifically, recent studies show that filopodia can probe and sense mechanical  
87 properties of the surrounding environment, guiding cell migration towards stiffer  
88 substrate (6, 28). Consistently, a recent work reported that a few pN forces applied to  
89 the tips of filopodia can significantly promote the filopodia adhesion and growth in  
90 HeLa-JW cells (7). Yet, the exact molecular mechanisms that underlie filopodia's  
91 mechanosensitivity still remain unclear.

92 Interestingly, it has been recently shown that  $\text{Ca}^{2+}$  channels are also required for  
93 proper formation and stabilization of filopodia in many different cell types (29).  
94 Furthermore, it was found that filopodia-dependent transient  $\text{Ca}^{2+}$  signals play a major  
95 role in guidance of cell migration (30). Importantly, several membrane ion channels  
96 have been also previously suggested to contribute to cells' mechanosensing either by  
97 direct response to the membrane tension or to tensile forces originating from the cell  
98 cytoskeleton. Of particular interest are  $\text{Ca}^{2+}$ -conducting channels such as Piezo 1 and  
99 Piezo 2 as well as members of TRP family (31, 32). Upon application of mechanical  
100 perturbations to a cell, these channels become rapidly activated through direct or  
101 indirect molecular mechanisms, causing influx of extracellular  $\text{Ca}^{2+}$  into the cell. The  
102 latter triggers activation of diverse downstream signaling cascades, many of which play  
103 critical roles in such important physiological processes as touch sensation, stem cell  
104 differentiation, development of vasculature and various human-related diseases (31, 32).  
105 Together with previous works that revealed filopodia as mechanosensing cell  
106 structures, these studies point to a possibility that transient  $\text{Ca}^{2+}$  signalling and the  
107 mechanosensing function of filopodia are coupled to each other, synergistically  
108 governing cell motion in a force-dependent manner.

109 Based on the above reasoning, we hypothesized that transient  $\text{Ca}^{2+}$  signals generated  
110 by filopodia may depend on mechanical stretching of the latter. To test this hypothesis,  
111 we used previously reported optical tweezers setup (7) to stretch individual filopodia  
112 over a physiological range of forces and examined whether the filopodia-related  $\text{Ca}^{2+}$   
113 signals experience any change in response to the applied mechanical load. It has been  
114 found that filopodia produce persistent  $\text{Ca}^{2+}$  oscillations in a force-dependent manner,  
115 which on a large part result from  $\text{Ca}^{2+}$  influx through voltage-gated L-type  $\text{Ca}^{2+}$   
116 channels that have been previously discovered in many cell types, including muscle,  
117 glial, neuronal and cancer cells (29, 33). Furthermore, by using a calpain activation  
118 sensor, it has been shown in our study that the force-induced influx of  $\text{Ca}^{2+}$  into

119 mechanically stretched filopodia results in downstream activation of calpain protease,  
120 which is known to be involved in regulation of the cell adhesion dynamics (34).  
121 Altogether, our results suggest that L-type  $\text{Ca}^{2+}$  channel-dependent signaling plays an  
122 important role in mechanosensing function of filopodia, regulating cell adhesion  
123 dynamics and motion in a force-dependent manner.

## 124 **Results**

### 125 **Mechanical stretching of individual filopodia activates intra-filopodial $\text{Ca}^{2+}$** 126 **oscillations**

127 First, we studied how mechanical forces alter  $\text{Ca}^{2+}$  signaling of filopodia in several cell  
128 lines. To promote filopodia formation in those cells, we used either mApple-myosin X  
129 construct or constitutively-active GFP-Cdc42 (Q61L), which are the two filopodia  
130 growth regulators known to be frequently overexpressed in multiple human cancers (35,  
131 36). Figure 1B shows a representative image of a wild-type (WT) HEK-293 cell  
132 transfected with mApple-myosin X. Numerous filopodia of several micrometers ( $\mu\text{m}$ )  
133 length with myosin X-enriched tips can be clearly seen from the image.

134 In order to visualize changes in the intra-filopodial  $\text{Ca}^{2+}$  level, we co-transfected  
135 HEK-293 WT cells with mApple-myosin X construct and GCaMP6f  $\text{Ca}^{2+}$  sensor (37).  
136 Interestingly, it has been found that filopodia of such cells occasionally produce  $\text{Ca}^{2+}$   
137 bursts (see Movie 1). However, frequency of these events appeared to be very low –  
138 measurements showed that only  $\sim 12\%$  of filopodia (i.e., 11 filopodia out of  $N = 92$   
139 monitored) generated 1 or 2 short bursts of transient  $\text{Ca}^{2+}$  signals lasting only for  $\sim 18$   
140  $\pm 5$  s (mean  $\pm$  s.e.m.) during 5-6 min observation period.

141 To check whether attachment of fibronectin-coated polystyrene microbeads to  
142 filopodia has any effect on  $\text{Ca}^{2+}$  signal behavior, we used optical tweezers to put  
143 microbeads onto the tips of individual filopodia, holding them there for  $\sim 2$ -3 sec to  
144 initiate beads interaction with filopodia before turning the trap off (see schematic Figure  
145 1C). Such simple binding of microbeads to filopodia alone in the absence of applied  
146 mechanical load did not change significantly the filopodial  $\text{Ca}^{2+}$  firing rate – only 25%  
147 of filopodia with microbeads produced a single transient  $\text{Ca}^{2+}$  signal during  $\sim 5$ -6 min  
148 observation period (the total number of monitored beads was  $N = 8$ ), see Movie 1.

149 Interestingly, all the beads attached to filopodia moved in the direction towards the  
150 cell body at a rate of  $26.9 \pm 2.5$  nm/s (mean  $\pm$  s.e.m.), which is similar to the rate of  
151 centripetal movement of actin filaments inside filopodia (7, 38). This indicated that  
152 fibronectin-coated microbeads were likely engaged to the filopodia actin cytoskeleton,  
153 which caused the beads movement towards the cell body due to the retrograde actin  
154 flow. Similar behavior was also observed in the case of concanavalin A-coated  
155 microbeads (ConA), suggesting that such movement of microbeads towards the cell  
156 body may not necessarily depend on the specific beads' interaction with integrin  
157 complexes.

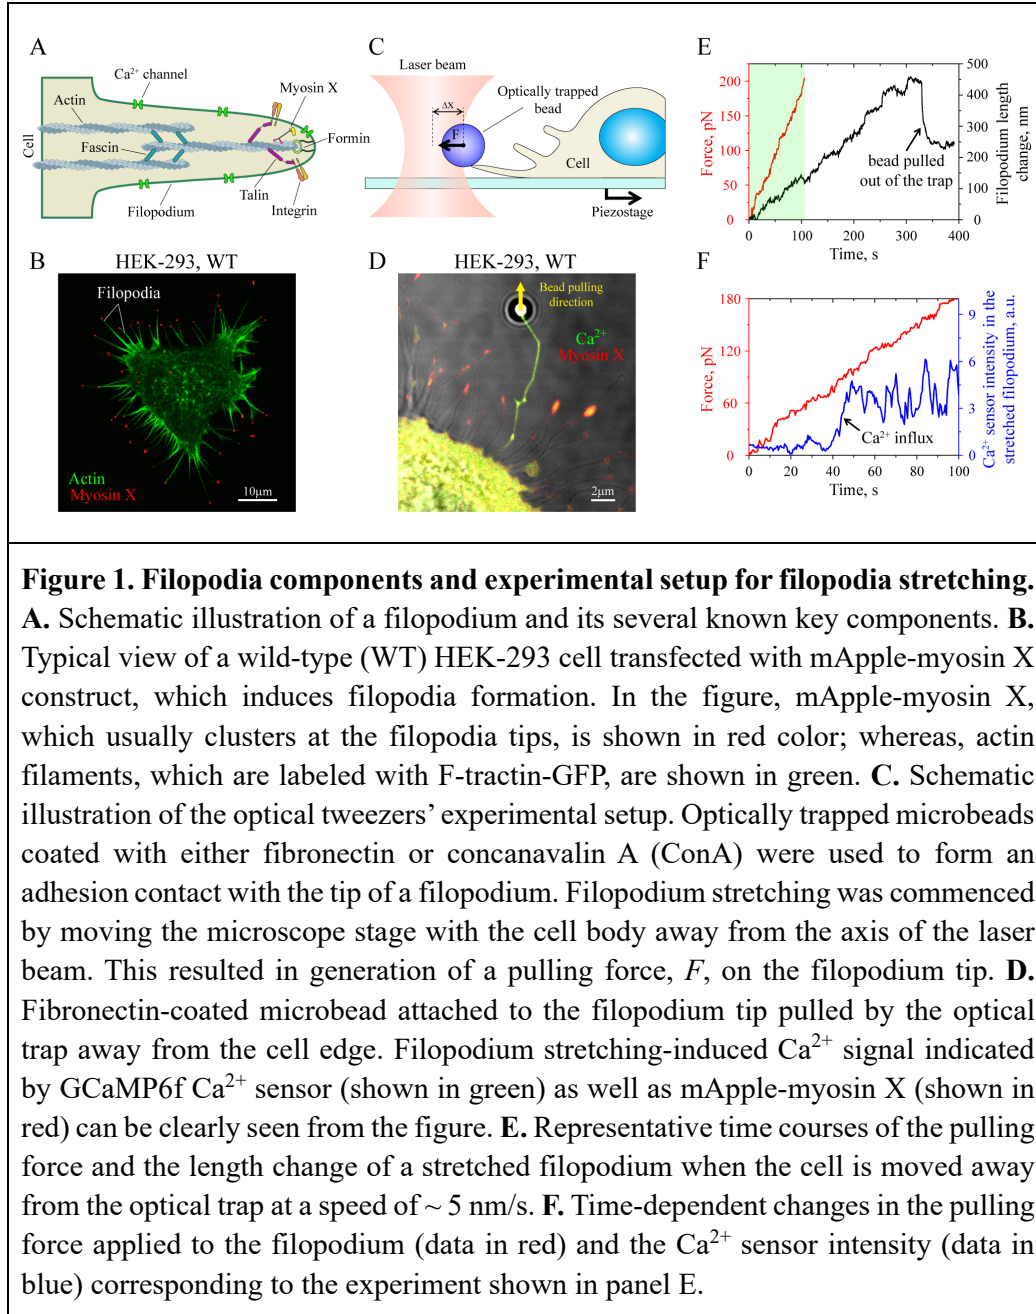

158

159 Next, we investigated the role of extracellular mechanical forces in filopodia-  
 160 dependent generation of  $\text{Ca}^{2+}$  signals. Optical tweezers setup schematically shown in  
 161 Figure 1C was used to apply 0-200 pN forces to fibronectin-coated microbeads adhered  
 162 to the filopodia tips (see Methods section for more details). The pulling force was  
 163 generated by movement of the microscope piezo-stage away from the optical trap axis  
 164 at a constant speed of  $\sim 5$  nm/s, stretching the filopodium attached to the trapped  
 165 microbead with gradually increasing force.

166 In the presence of mechanical stretching, intense and highly dynamic  $\text{Ca}^{2+}$  signals  
167 were observed in  $\sim 82\%$  of pulled filopodia (9 out of  $N = 11$  tested filopodia from  
168 different cells) that lasted for many minutes, which was in strong contrast to rare  $\text{Ca}^{2+}$   
169 signals produced by unperturbed filopodia ( $\sim 12\%$ , 7 out of  $N = 57$  filopodia) or by  
170 filopodia bound to microbeads in the absence of applied mechanical load ( $\sim 25\%$ , 2 out  
171 of  $N = 8$  filopodia). Figure 1D and Movies 2A and 2B show a typical example of a  
172 mechanically stretched filopodium with a clearly visible force-induced  $\text{Ca}^{2+}$  signal.  
173 Interestingly, from Movie 2B it can be seen that the  $\text{Ca}^{2+}$  signal was propagating from  
174 the tip of the stretched filopodium towards the cell body, which was a general trend in  
175 the pulled filopodia.

176 Figures 1E-F display representative time traces of the force applied to a stretched  
177 filopodium, and the corresponding changes in the filopodium length and intra-  
178 filopodial  $\text{Ca}^{2+}$  level. As can be seen from Figure 1F, the  $\text{Ca}^{2+}$  sensor intensity increased  
179 abruptly at  $\sim 45$  sec after the beginning of the filopodium pulling when the force  
180 reached  $\sim 70$  pN level. Measurements from eight independent experiments indicate that  
181 the average force required for activation of the  $\text{Ca}^{2+}$  signal inside filopodia is  $F_{\text{activation}}$   
182  $= 78 \pm 22$  pN (mean  $\pm$  s.e.m), and it does not show any apparent correlation with the  
183 extension change of the pulled filopodia (Figure S1).

184 Once the  $\text{Ca}^{2+}$  signal appeared, it could persist for several minutes regardless of  
185 whether the force was retained or released (see Figure 2C, middle panel), suggesting  
186 that filopodia-dependent  $\text{Ca}^{2+}$  signaling system has a memory effect, and mechanical  
187 stretching is required only for initiation of the first several  $\text{Ca}^{2+}$  impulses. Furthermore,  
188 in  $\sim 73\%$  of the cases (8 out of  $N = 11$  tested filopodia), during the period when the  
189  $\text{Ca}^{2+}$  signal persisted, the strength of the signal oscillated in time with a period of  $\sim 10$   
190 s (Figure 2C, right panel).

191 Very similar force-dependent  $\text{Ca}^{2+}$  signals were also observed in MCF-7 and A2058  
192 cells co-transfected with GCaMP6f and mApple-myosin X constructs, see Figure S2.  
193 Thus, we conclude that mechanical stretching of filopodia strongly promotes the  
194 appearance probability of filopodia-generated  $\text{Ca}^{2+}$  signals not only in HEK-293 cells,  
195 but also in other cell lines.

196 Force-dependent  $\text{Ca}^{2+}$  signals were also found to be produced by filopodia, whose  
197 growth was induced by expression of constitutively active Cdc42 (Q61L) in HEK-293  
198 WT cells (see Movie 3), indicating that the observed phenomenon was rather general  
199 and not specific to myosin X-induced or Cdc42-induced filopodia.

200 We then checked whether such  $\text{Ca}^{2+}$  signals were induced by bona fide  
201 mechanosensitive calcium channels such as Piezo 1. Surprisingly, filopodial stretch-  
202 induced  $\text{Ca}^{2+}$  signals were also observed in a stable Piezo 1 knockout HEK-293 cell  
203 line (Figure 2). In addition, rescue of Piezo 1 via overexpression of Piezo 1-GFP  
204 construct in the knockout HEK-293 cells did not seem to have any effect on intra-  
205 filopodial  $\text{Ca}^{2+}$  signals as their behavior and time characteristics were similar to those  
206 found in HEK-293 Piezo 1 KO cells. Furthermore, HEK-293 cells are known to have a  
207 low expression level of Piezo 2 based on RNA-seq assays (39-41). Consistently, our

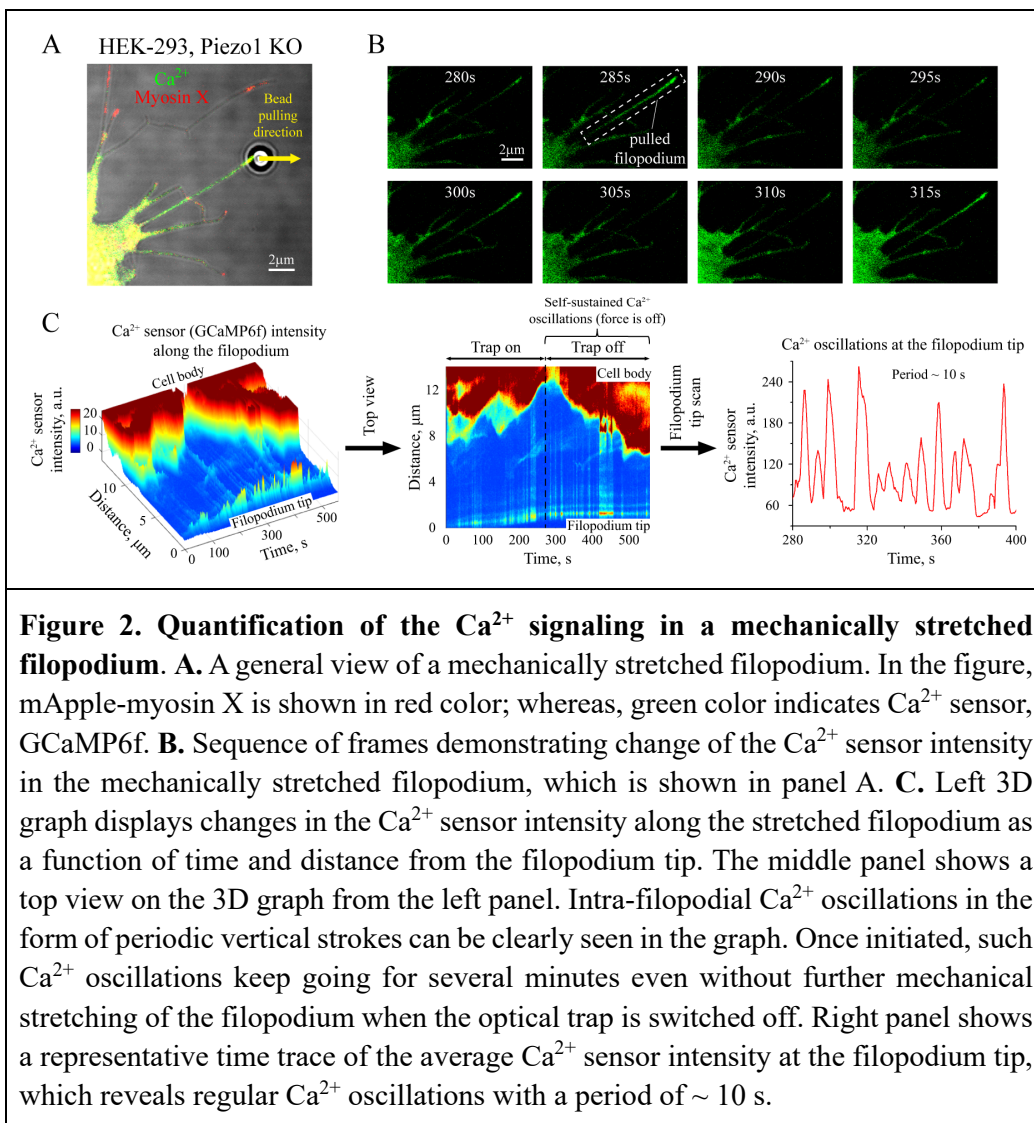

208

209 qPCR analysis of HEK-293 Piezo 1 KO cell line demonstrated a very low level of Piezo  
 210 2 mRNA in comparison to housekeeping GAPDH gene, whose mRNA level was  
 211 approximately  $2^{16} \approx 65000$  times higher than that of Piezo 2 gene, see  $C_q$  values  
 212 measured by qPCR for both of the genes in Table T1. Altogether, these results suggest  
 213 that Piezo 1 and most probably Piezo 2 do not make a significant contribution to the  
 214 observed force-dependent Ca<sup>2+</sup> signals in filopodia.

215 Interestingly, intra-filopodial Ca<sup>2+</sup> signals were also found to be independent from  
 216 the integrin-mediated adhesion, since they were observed in filopodia stretched by  
 217 using ConA-coated microbeads that do not activate integrin-related protein assembly at  
 218 the attachment site (42, 43) (see Movie 4).

219 Finally, it should be noted that in ~ 40% (i.e., 4 out of N = 11) of experiments initial  
 220 intra-filopodial Ca<sup>2+</sup> signal resulted in strong elevation of the Ca<sup>2+</sup> level in nearby cell

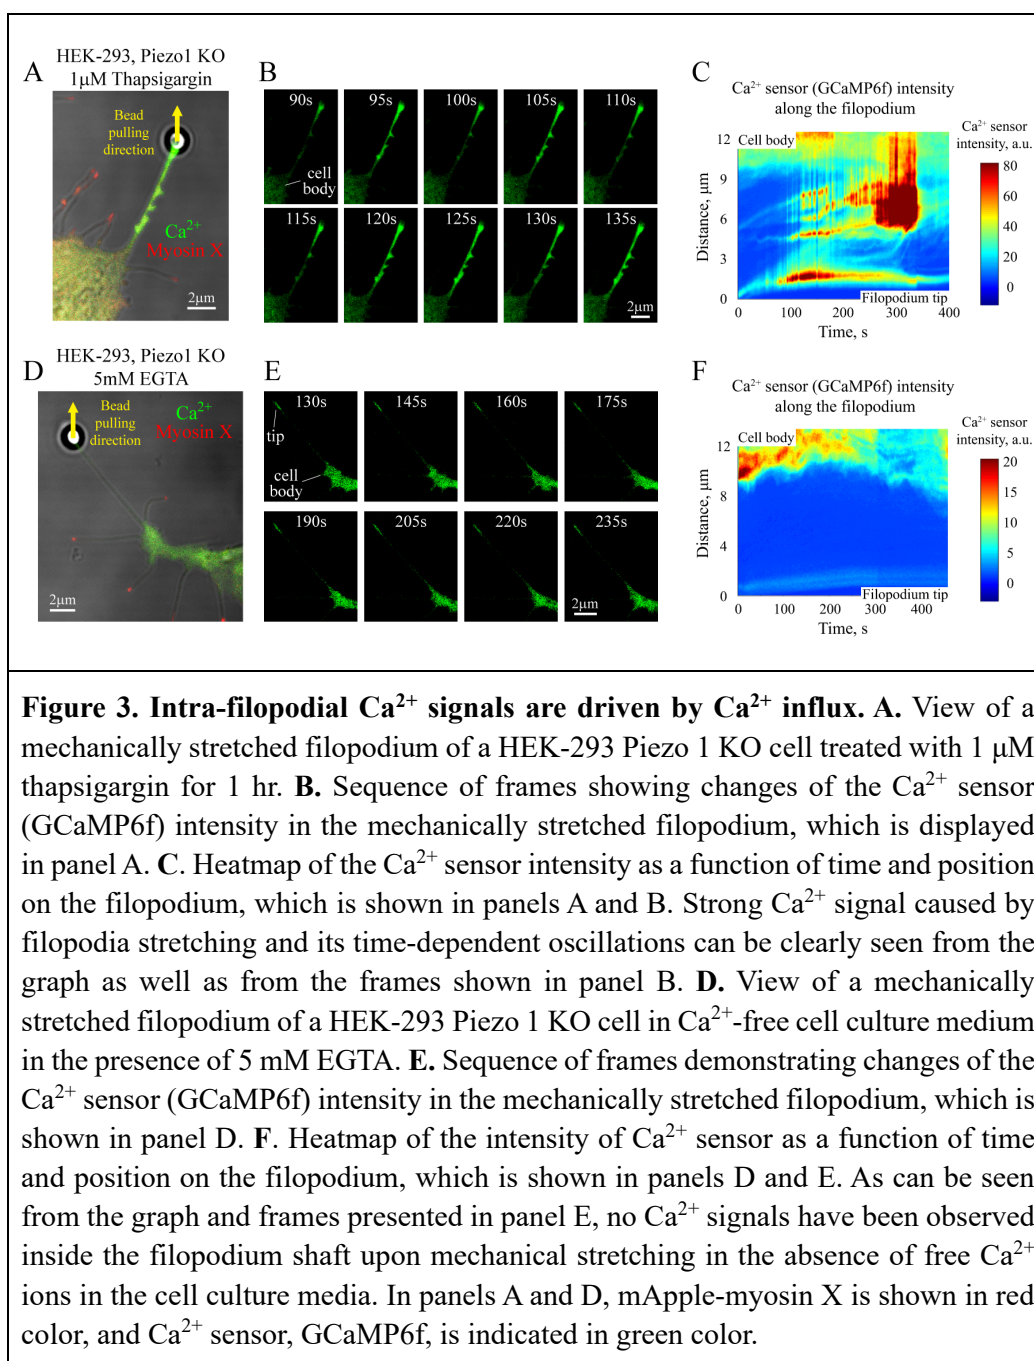

221

222 cortex or even the whole cells during  $\sim 5$  min observation period (see Movies 5A,B).  
 223 On the other hand, the probability to see  $\text{Ca}^{2+}$  oscillations in the cell cytoplasm in the  
 224 absence of filopodia stretching during a similar time interval was found to be  $< 10\%$  (1  
 225 out of  $N = 11$  cells). These observations suggest that the local mechanical activation of  
 226  $\text{Ca}^{2+}$  signaling in stretched filopodia may potentially trigger a global response in cells  
 227 under certain conditions. Such phenomenon took place independently of the type of the  
 228 beads (ConA- or fibronectin-covered) used in filopodia stretching experiments.



229

### 230 **Intra-filopodial Ca<sup>2+</sup> signals are driven by Ca<sup>2+</sup> influx**

231 In order to understand whether the observed Ca<sup>2+</sup> signals were caused by influx of Ca<sup>2+</sup>  
232 ions from the cell culture medium or by Ca<sup>2+</sup> release from endoplasmic reticulum, we  
233 treated cells with 1 μM thapsigargin for 1 hour, which caused release of Ca<sup>2+</sup> ions from  
234 intracellular calcium-storage organelles. Should the Ca<sup>2+</sup> signals in mechanically  
235 stretched filopodia originate from force-induced release of Ca<sup>2+</sup> from intracellular  
236 calcium -storage organelles, such treatment would abolish intra-filopodial signaling as  
237 Ca<sup>2+</sup> ions were already set free due to the action of the drug. In contrast to this  
238 expectation, we still observed elevation of the intra-filopodial Ca<sup>2+</sup> level upon  
239 mechanical stretching of filopodia in thapsigargin-treated cells (~ 80%, 12 out of N =  
240 15 cells) suggesting that the signal was likely caused by influx of Ca<sup>2+</sup> ions from the  
241 exterior culture medium rather than from intracellular calcium-storage compartments,  
242 see Figure 3A-C and Movie 6.

243 To test this hypothesis, we further performed filopodia stretching experiments in  
244 Ca<sup>2+</sup>-free cell culture medium, adding to it Ca<sup>2+</sup> chelating agent, EGTA, at 5 mM  
245 concentration. Such experimental conditions led to complete disappearance of force-  
246 induced Ca<sup>2+</sup> signals in the shafts of mechanically stretched filopodia of HEK-293  
247 Piezo1 KO cells (in 10 out of N = 10 tested filopodia, 100%), see Figures 3D-F and  
248 Movie 7. These results suggest that intra-filopodial Ca<sup>2+</sup> signals are indeed caused by  
249 influx of extracellular Ca<sup>2+</sup> ions from the cell culture medium.

### 250 **L-type Ca<sup>2+</sup> channels contribute to generation of intra-filopodial Ca<sup>2+</sup> signals**

251 Influx of Ca<sup>2+</sup> ions into filopodia from the cell culture media indicated that some  
252 transmembrane Ca<sup>2+</sup> channels were opened by filopodia mechanical stretching. The fact  
253 that intra-filopodial Ca<sup>2+</sup> signals were observed in HEK-293 Piezo 1 KO cells, which  
254 have a very low expression level of Piezo 2, argues against possibility of Piezo 1 and  
255 Piezo 2 Ca<sup>2+</sup> channels to be major candidates. In our effort to identify protein complexes  
256 responsible for such Ca<sup>2+</sup> signals, we screened a few more previously reported  
257 mechanosensitive Ca<sup>2+</sup> channels by using pharmacological inhibition assays in  
258 filopodia stretching experiments, checking whether there are any changes in the force-  
259 dependent Ca<sup>2+</sup> signal response.

260 First, we tested TRPV4 mechanosensing Ca<sup>2+</sup> channel (44, 45). To this aim, we  
261 treated HEK-293 Piezo 1 KO cells with 1 μM GSK2193874 for 30 min to inhibit  
262 TRPV4 (46). By using optical tweezers, it then has been found that despite the cells'  
263 treatment with the drug, intra-filopodial Ca<sup>2+</sup> signals still were present in 100% (12 out  
264 of N = 12) of mechanically stretched filopodia (see Movie 8). Thus, it seemed that  
265 TRPV4 channels did not substantially contribute to intra-filopodial Ca<sup>2+</sup> signaling  
266 based on the cells treatment with the drug – a result, which is consistent with the recent  
267 finding showing that mammalian TRP channels, including TRPV4, cannot be activated  
268 by membrane stretching (47).

269 Next, we tested voltage-gated L-type  $\text{Ca}^{2+}$  channels since they have been previously  
270 shown to play an important role in formation of filopodia by promoting and stabilizing  
271 their growth (29). It has been previously reported that native L-type  $\text{Ca}^{2+}$  currents  
272 recorded in rat cardiomyocytes as well as human intestinal smooth muscle and rat  
273 mesenteric arterial smooth muscle cells demonstrate response to the cells' stretching  
274 (48-50). Thus, the same channels may have been involved in the mechanically induced  
275 intra-filopodial  $\text{Ca}^{2+}$  influx observed in filopodia pulling experiments.

276 Indeed, qPCR assay performed on HEK-293 Piezo 1 KO cells has shown that the  
277 average mRNA level of CACNA1C gene, which encodes the pore-forming  $\alpha_{1C}$  subunit  
278 of L-type  $\text{Ca}^{2+}$  channels, is more than 10 times higher than that of Piezo 2 (see Table  
279 T1), suggesting that L-type  $\text{Ca}^{2+}$  channels may potentially have a stronger effect on the  
280 cell mechanosensing. Consistently, by treating HEK-293 Piezo 1 KO cells with 10  $\mu\text{M}$   
281 amlodipine besylate, a known inhibitor of L-type  $\text{Ca}^{2+}$  channels (51), for 30 min, we  
282 have found that the fraction of cells in which mechanically-induced  $\text{Ca}^{2+}$  signal was  
283 observed in stretched filopodia was significantly decreased. Namely, a strong  $\text{Ca}^{2+}$   
284 signal was found to be produced only in approximately  $\sim 56\%$  of tested filopodia (13  
285 out of  $N = 23$ ), which was lower than in the case of untreated HEK-293 Piezo 1 KO  
286 and HEK-293 WT cells, where the  $\text{Ca}^{2+}$  signal has been found to form in majority of  
287 mechanically stretched filopodia ( $\sim 82\%$ , 9 out  $N = 11$ , WT cells, and 100%, 11 out of  
288  $N = 11$ , Piezo 1 KO cells). Figures 4A-F show two representative examples, one with  
289 a strongly suppressed  $\text{Ca}^{2+}$  signal in the presence of 10  $\mu\text{M}$  amlodipine besylate in the  
290 cell culture medium (Figures 4A-C and Movie 9), and another with a  $\text{Ca}^{2+}$  signal  
291 retained under the same experimental conditions (Figures 4D-F and Movie 10).

292 To check whether suppression of the  $\text{Ca}^{2+}$  signal by amlodipine besylate was  
293 reversible, we washed out the drug from the medium and repeated filopodia stretching  
294 experiments after 30 minutes incubation time. It has been found that the percentage of  
295 filopodia generating  $\text{Ca}^{2+}$  signal upon mechanical stretching (100%, 13 out of  $N = 13$   
296 tested filopodia) returned to a level similar to that observed in untreated cells ( $\sim 90\%$ ,  
297 9 out of  $N = 10$  tested filopodia). These results strongly suggest that suppression of  $\text{Ca}^{2+}$   
298 signal in stretched filopodia was indeed reversible and caused by amlodipine besylate.

299 While the exact reason why amlodipine besylate affected  $\text{Ca}^{2+}$  influx only in a  
300 fraction of the treated cells was unclear, overall the above data indicate that L-type  $\text{Ca}^{2+}$   
301 channels are a key player being involved in formation and propagation of  $\text{Ca}^{2+}$  signals  
302 in mechanically stretched filopodia.

303 To further test this hypothesis, we carried out additional filopodia stretching  
304 experiments on HeLa cells that have been previously reported to have a low expression  
305 level of L-type  $\text{Ca}^{2+}$  channels (29, 40, 41). Consistently, the force-induced  $\text{Ca}^{2+}$  influx  
306 was detected in less than half of the pulled filopodia of HeLa-JW cells, with only  $\sim 42\%$   
307 of filopodia (8 out  $N = 19$ ) generating sufficiently strong  $\text{Ca}^{2+}$  signal, see Figures 4G-I  
308 and Movie 11. This result was in stark contrast to  $\sim 80-100\%$  probability to observe  
309  $\text{Ca}^{2+}$  signal in mechanically stretched filopodia of HEK-293 cells. After transfection of  
310 HeLa-JW cells with a plasmid encoding the pore-forming  $\alpha_{1C}$  subunit (Cav1.2) of

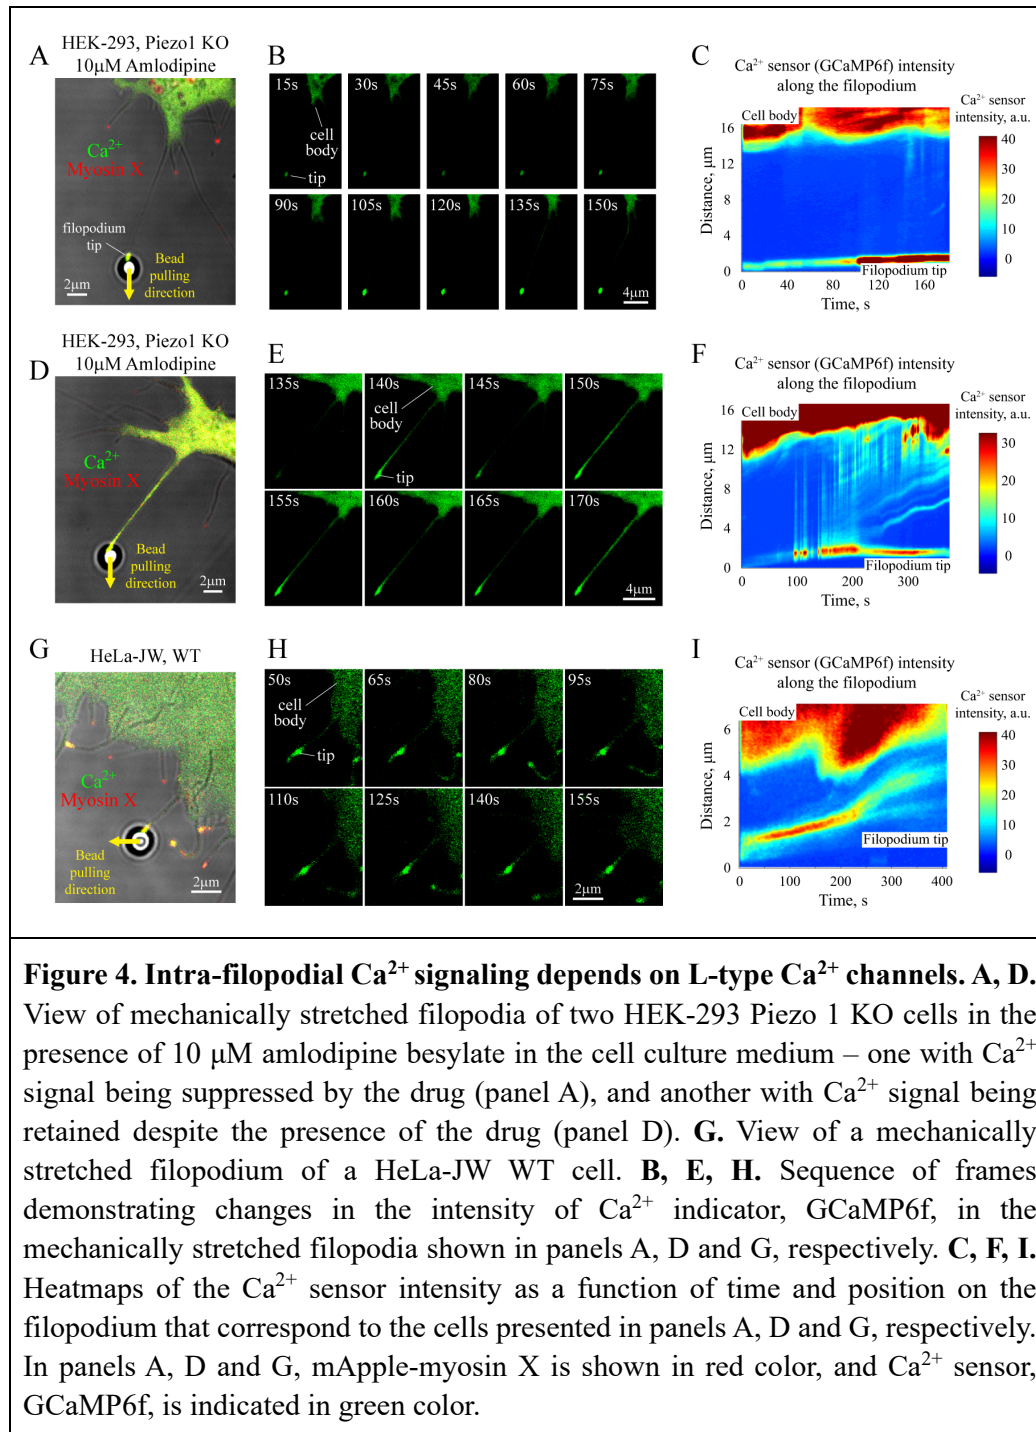

311

312 L-type  $\text{Ca}^{2+}$  channels, the probability to spot the force-induced  $\text{Ca}^{2+}$  signal in stretched  
 313 filopodia increased significantly – up to  $\sim 79\%$  (15 out of  $N = 19$  of tested filopodia,  
 314 see also Movie 12). On the other hand, almost no change in the  $\text{Ca}^{2+}$  signal appearance  
 315 probability ( $\sim 36\%$ , 5 out of  $N = 14$  tested filopodia) has been found in mechanically  
 316 stretched filopodia of HeLa-JW cells transfected with an empty vector backbone.

317 Altogether, these results strongly suggest that L-type  $\text{Ca}^{2+}$  channels play a critical role  
318 in formation of the force-induced  $\text{Ca}^{2+}$  signals in filopodia.

319

### 320 **Probability of $\text{Ca}^{2+}$ influx into mechanically stretched filopodia under different** 321 **experimental conditions**

322 In order to have a more quantitative and statistically unbiased understanding of how the  
323 observed  $\text{Ca}^{2+}$  signal in mechanically stretched filopodia is affected by various factors  
324 and to summarize the results presented above, we measured the maximum intensity of  
325  $\text{Ca}^{2+}$  signal in the shafts of stretched filopodia (excluding the tip region attached to the  
326 trapped bead), which was then normalized to the average  $\text{Ca}^{2+}$  sensor intensity in the  
327 cell cytoplasm, see Methods and Figure S3 for more details. The results obtained from  
328 different cell types under various experimental conditions are displayed in the form of  
329 a boxplot in Figure 5.

330 As can be seen from the figure,  $\text{Ca}^{2+}$  signals produced by bead-attached filopodia in  
331 the absence of mechanical load had very low normalized maximum intensities ( $\sim 0.1$ –  
332  $0.2$ , see columns 6 and 8) corresponding to the peak levels of individual weak transient  
333  $\text{Ca}^{2+}$  spikes. In contrast, in mechanically stretched filopodia (columns 4, 5 and 7),  $\text{Ca}^{2+}$   
334 influx was much stronger and occurred at higher frequency independently of the  
335 expression level of Piezo 1  $\text{Ca}^{2+}$  channels in HEK-293 cells and the microbeads' coating  
336 used in experiments, resulting in significantly larger normalized maximum intensity of  
337 the  $\text{Ca}^{2+}$  signal. Use of  $\text{Ca}^{2+}$ -free cell culture medium with additional 5 mM EGTA  
338 completely abolished all intra-filopodial  $\text{Ca}^{2+}$  signals (column 10). In contrast, no  
339 statistically significant change in the maximum normalized  $\text{Ca}^{2+}$  sensor intensity has  
340 been observed in mechanically stretched filopodia of HEK-293 Piezo 1 KO cells treated  
341 with 1  $\mu\text{M}$  of thapsigargin (column 9) in comparison to untreated cells (column 7). Thus,  
342 it can be concluded that the force-induced  $\text{Ca}^{2+}$  signals in mechanically stretched  
343 filopodia emerge due to influx of extracellular  $\text{Ca}^{2+}$  rather than due to  $\text{Ca}^{2+}$  release from  
344 calcium-storing cell organelles, such as endoplasmic reticulum.

345 Data obtained in the presence of 1  $\mu\text{M}$  of TRPV4 channel inhibitor, GSK2193874,  
346 reveal that this mechanosensitive  $\text{Ca}^{2+}$  channel does not make a substantial contribution  
347 to the observed intra-filopodial  $\text{Ca}^{2+}$  signals (column 11). In contrast, cells treatment  
348 with 10  $\mu\text{M}$  amlodipine besylate, a known inhibitor of L-type voltage-gated  $\text{Ca}^{2+}$   
349 channels (VGCC), as well as subsequent wash out of the drug from the cell culture  
350 medium had significant effects on the maximum normalized intensities of  $\text{Ca}^{2+}$  signals  
351 that form in response to filopodia stretching (columns 12 and 13). These results indicate  
352 that L-type  $\text{Ca}^{2+}$  channels make a significant contribution to the observed force-  
353 dependent  $\text{Ca}^{2+}$  signaling in filopodia.

354 Indeed, by carrying out filopodia stretching experiments on wild-type (WT) HeLa  
355 cells (column 1), which have been reported to have a low expression level of L-type  
356  $\text{Ca}^{2+}$  channels based on RNA-seq assay (29, 40, 41), it has been found that the  
357 maximum normalized intensities of force-induced  $\text{Ca}^{2+}$  signals produced by filopodia

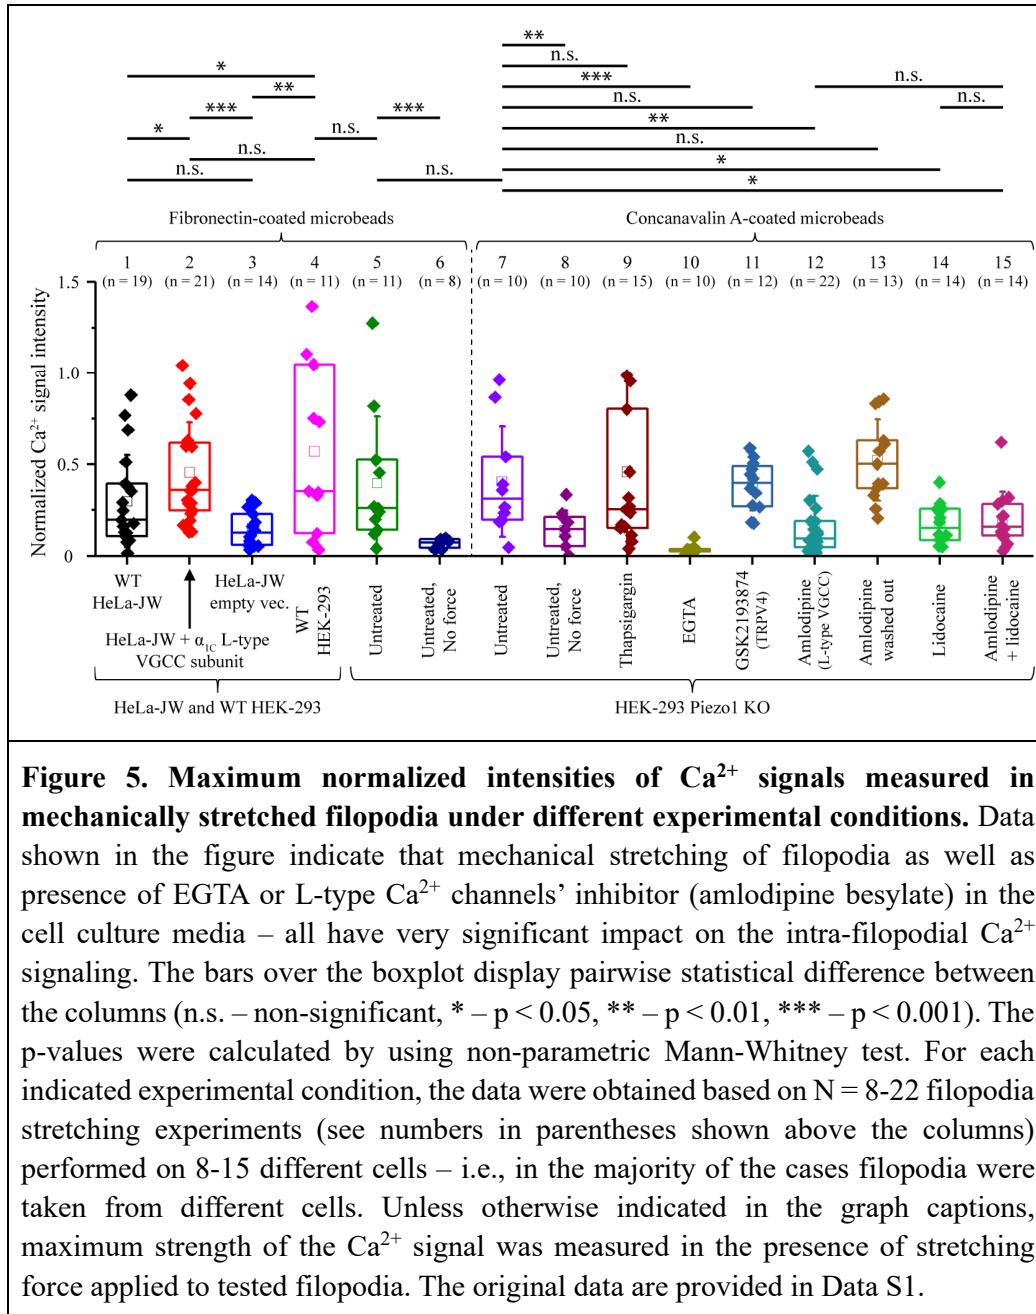

358

359 of such cells are weaker than in the case of WT HEK-293 cells (column 4) whose  
 360 expression level of L-type Ca<sup>2+</sup> channels is higher based on the same RNA-seq assay  
 361 (40, 41). Furthermore, after transfection of HeLa-JW cells with a plasmid encoding the  
 362 pore-forming  $\alpha_{1C}$  subunit (Cav1.2) of L-type Ca<sup>2+</sup> channels, the maximum normalized  
 363 intensities of Ca<sup>2+</sup> signals generated by mechanically stretched filopodia increased  
 364 significantly (column 2), reaching practically the same level as in the case of WT HEK-  
 365 293 cells (column 4). As such increase has not been observed in control experiments  
 366 done on HeLa-JW cells transfected with an empty vector backbone (column 3), it can

367 be concluded that L-type  $\text{Ca}^{2+}$  channels indeed play a critical role in formation of the  
368 observed force-dependent  $\text{Ca}^{2+}$  signals in filopodia.

369 Finally, it is interesting to note that treatment of HEK-293 Piezo 1 KO cells with 2  
370 mM lidocaine, a known inhibitor of voltage-gated  $\text{Na}^+$  channels (52), or with a  
371 combination of 2 mM lidocaine and 10  $\mu\text{M}$  amlodipine besylate resulted in decrease of  
372 the maximum normalized intensities of intra-filopodial  $\text{Ca}^{2+}$  signals (columns 14 and  
373 15 in Figure 5), which was similar to the case of cells treated with amlodipine besylate  
374 alone (column 12). These experimental data suggest existence of an intricate interplay  
375 between the membrane potential and voltage-gated L-type  $\text{Ca}^{2+}$  channels in the force-  
376 dependent generation of  $\text{Ca}^{2+}$  influx into mechanically stretched filopodia.

377

### 378 **Force-dependent $\text{Ca}^{2+}$ influx triggers local calpain activity**

379 Previous experimental studies done on neurite growth cones suggest that  $\text{Ca}^{2+}$  signals  
380 generated by filopodia are used by neural cells during the growth cone pathfinding  
381 process, which appears to be driven by local  $\text{Ca}^{2+}$ -dependent activation of calpain  
382 protease (30, 53). The latter is known to be involved in regulation of many adhesion-  
383 related proteins, resulting in local changes of the cell adhesion strength to extracellular  
384 matrix (ECM), which is one of the molecular mechanisms underlying cells motion  
385 through ECM (34). Based on these studies and our experimental findings it can be  
386 hypothesized that the force-dependent  $\text{Ca}^{2+}$  influx may potentially affect calpain  
387 activity in mechanically stretched filopodia, leading to downstream regulation of cell  
388 adhesion complexes.

389 To test whether the observed intra-filopodial  $\text{Ca}^{2+}$  influx is sufficient to activate  
390 calpain, we performed filopodia stretching experiments on HEK-293 Piezo1 KO cells  
391 transfected with a vector encoding CFP-YFP FRET sensor for calpain activity. This  
392 sensor consists of CFP and YFP fluorescent domains linked by a peptide containing a  
393 calpain cleavage site (54). Upon activation, calpain cleaves the peptide linking CFP and  
394 YFP domains, resulting in loss of the apparent FRET signal, which can be easily  
395 detected in experiments (i.e., the ratio between YFP and CFP fluorescence intensities  
396 decreases).

397 Figures 6A-B demonstrate typical time-dependent changes in the apparent FRET  
398 ratio of the CFP-YFP sensor in two different cells in response to mechanical stretching  
399 of the filopodia, which are indicated by cyan arrows. From these figures it can be seen  
400 that calpain activation usually takes place within the first 1-2 minutes after the start of  
401 filopodia stretching, which is consistent with a local elevation of the  $\text{Ca}^{2+}$  concentration  
402 in filopodia due to the force-induced  $\text{Ca}^{2+}$  influx. Interestingly, Figure 6B shows that  
403 application of mechanical force not only results in activation of calpain in the stretched  
404 filopodium itself, but also frequently causes increase in the calpain activity in nearby  
405 cell regions. This phenomenon is likely related to propagation of the initial intra-  
406 filopodial  $\text{Ca}^{2+}$  signal induced by the filopodium stretching to nearby lamellipodia or  
407 even the whole cell body that has been mentioned at the end of the first Result section.

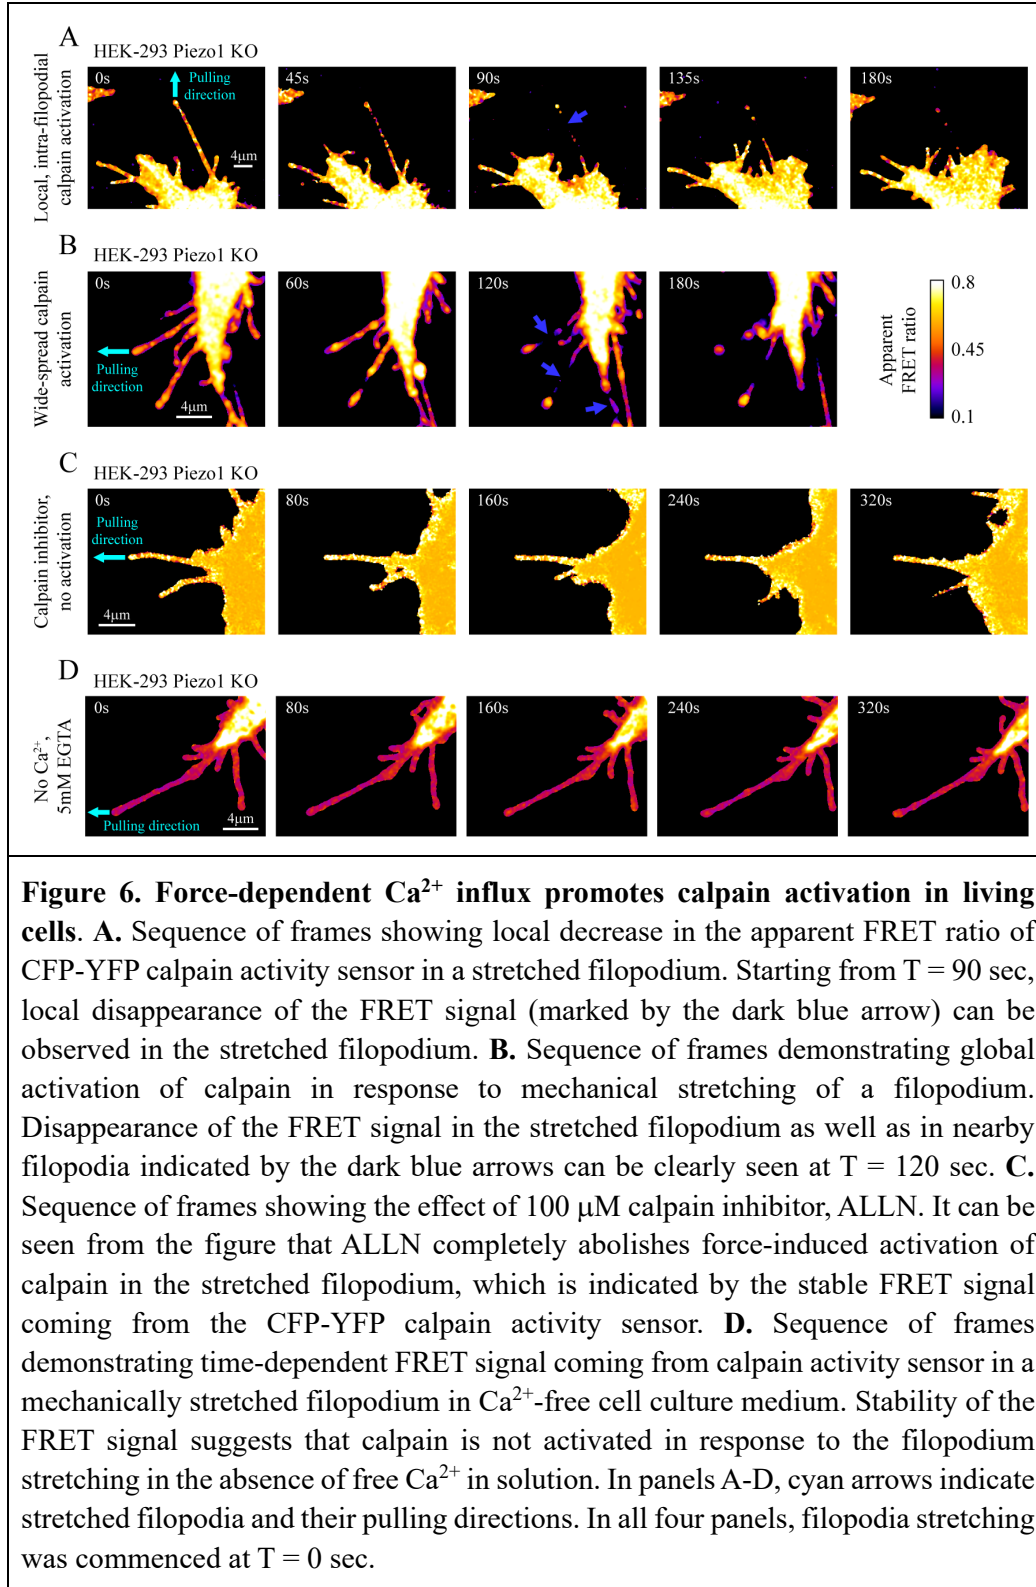

408

409 To check that the observed decrease in the FRET signal coming from the CFP-YFP  
410 sensor is caused by calpain activation, we treated cells with 100  $\mu$ M calpain inhibitor,  
411 ALLN (55), for 1 hour and repeated the above experiment. It has been found that the  
412 FRET signal in mechanically stretched filopodia of such cells remained constant over  
413 minutes of the force application for all the tested filopodia (N = 6) (see Figure 6C),  
414 confirming that the observed FRET signal decrease in the case of untreated cells is  
415 indeed caused by calpain activation in stretched filopodia.

416 To find out whether calpain activation takes place due to influx of extracellular  $\text{Ca}^{2+}$ ,  
417 we repeated filopodia stretching experiments in  $\text{Ca}^{2+}$ -free cell culture media, which  
418 additionally contained 5 mM EGTA. Under such experimental conditions, FRET signal  
419 coming from the CFP-YFP calpain activity sensor stayed at the same stable level  
420 without showing any tendency to decrease over  $\sim$  5-6 minutes of observation period for  
421 all the stretched filopodia (N = 6), see Figure 6D. In combination with previous results,  
422 this finding suggests that  $\text{Ca}^{2+}$  influx into filopodia is necessary for calpain activation.  
423 Thus, calpain activation in response to filopodia stretching is one of the main  
424 downstream effects of the force-induced intra-filopodial  $\text{Ca}^{2+}$  influx, which has a strong  
425 impact on local adhesion strength of living cells (34).

426

## 427 **Discussion**

428 In this study, it has been shown that filopodia are highly sensitive structures producing  
429 local  $\text{Ca}^{2+}$  signals in response to mechanical load. Application of pulling forces in the  
430 range of tens of pN to filopodia tips was found to dramatically increase influx of  
431 extracellular  $\text{Ca}^{2+}$  through transmembrane channels, resulting in formation of persistent  
432 intra-filopodial  $\text{Ca}^{2+}$  oscillations. The latter could last for many minutes even after the  
433 force was released, indicating existence of filopodia memory effect. Such a force-  
434 dependent activation of  $\text{Ca}^{2+}$  signaling in filopodia has been observed in several distinct  
435 types of living cells, including human embryonic kidney cells (HEK-293), breast cancer  
436 epithelial cells (MCF-7) and metastatic melanoma cells (A2058), suggesting that it is  
437 based on rather universal molecular mechanisms. However, in some other cell types  
438 (HeLa-JW) force-dependent  $\text{Ca}^{2+}$  influx into filopodia was found to be weak if existing  
439 at all.

440 To obtain insights into the potential role of various  $\text{Ca}^{2+}$  channels in this phenomenon,  
441 we utilized pharmacological inhibition and knock-out assays based on HEK-293 cell  
442 line in combination with filopodia stretching experiments. In this way, we excluded the  
443 possibility that such force-dependent activation of  $\text{Ca}^{2+}$  influx into filopodia is mediated  
444 by Piezo 1 or TRPV4 transmembrane proteins, which are two known mechanosensitive  
445  $\text{Ca}^{2+}$  channels (31, 32). Furthermore, qPCR assay performed on HEK-293 Piezo 1 KO  
446 cells showed that Piezo 2 mechanosensing  $\text{Ca}^{2+}$  channel is also unlikely to be an  
447 important component in the observed phenomenon as its transcription level was found  
448 to be very low.



449 Besides the above mechanosensitive  $\text{Ca}^{2+}$  channels, GPR68, a G protein-coupled  
450 receptor, is also known to induce elevation of intracellular  $\text{Ca}^{2+}$  level in living cells  
451 upon mechanical stimulation (56). However, GPR68-related mechanism is based on the  
452 release of  $\text{Ca}^{2+}$  ions from intracellular storages sensitive to thapsigargin treatment (56),  
453 which cannot be the cause of the force-dependent extracellular  $\text{Ca}^{2+}$  influx into  
454 filopodia observed in our study.

455 On the other hand, results of pharmacological inhibition of L-type  $\text{Ca}^{2+}$  channels in  
456 HEK-293 cells demonstrated that these channels play a major role in the force-induced  
457  $\text{Ca}^{2+}$  signaling in stretched filopodia. This finding is further supported by observation  
458 that overexpression of the pore-forming  $\alpha_{1C}$  subunit of L-type  $\text{Ca}^{2+}$  channels in HeLa-  
459 JW cells that normally express it weakly, leads to a statistically significant increase in  
460 the  $\text{Ca}^{2+}$  influx in response to filopodia stretching.

461 However, it is not yet clear whether these channels function as primary  
462 mechanosensors or amplify an upstream signal generated by other type of molecules.  
463 In this connection, it is interesting to note that treatment of HEK-293 Piezo 1 KO cells  
464 with lidocaine, which inhibits membrane depolarization by  $\text{Na}^+$  channels (52), leads to  
465 a similar level of decrease in strength of intra-filopodial  $\text{Ca}^{2+}$  signals as inhibition of L-  
466 type  $\text{Ca}^{2+}$  channels by amlodipine besylate. As it is known that some  $\text{Na}^+$  channels are  
467 mechanosensitive (57), there remains a possibility that primary mechano-response is  
468 generated by mechanosensing  $\text{Na}^+$  channels, while voltage-gated L-type  $\text{Ca}^{2+}$  channels  
469 function downstream of them. Other potentially mechanosensory molecules, such as  
470 adhesion- and actin cytoskeleton-related talin and formin, which are found in filopodia  
471 (7, 58-64), could in principle also be primary initiators of mechano-response. Of note,  
472 however, integrin-dependent mechanosensitivity does not seem to be necessary for  
473 mechano-stimulation of  $\text{Ca}^{2+}$  influx into filopodia in our system. Indeed,  $\text{Ca}^{2+}$  influx  
474 could be induced by applying force not only to fibronectin-coated microbeads that  
475 specifically interact with integrins, but also to microbeads coated with ConA, which  
476 interact with any molecules bearing  $\alpha$ -D-mannosyl and  $\alpha$ -D-glucosyl groups and which  
477 traditionally used as a negative control in integrin-signaling studies (42, 43).

478 Thus, our findings suggest existence of either direct or indirect mechanosensitivity  
479 of L-type  $\text{Ca}^{2+}$  channels residing on the filopodia surface. Prior to this work, the  
480 potential mechanosensitivity of L-type  $\text{Ca}^{2+}$  channels was only implicated in muscle  
481 cells, such as rat cardiomyocytes (50), human intestinal smooth muscle (48) and rat  
482 mesenteric arterial smooth muscle cells (49), mainly from studies based on whole-cell  
483 patch-clamp experiments. However, our study has shown that these  $\text{Ca}^{2+}$  channels may  
484 contribute to mechanosensing behavior of a much larger group of living cells and  
485 revealed importance of filopodia in this type of mechano-response. In addition, while  
486 previous studies showed that L-type  $\text{Ca}^{2+}$  channels localized to filopodia are important  
487 for maintenance of filopodia integrity (29), here we demonstrated that these channels  
488 as well mediate the force-induced  $\text{Ca}^{2+}$  influx into filopodia.

489 Furthermore, we have shown that force-dependent  $\text{Ca}^{2+}$  influx into mechanically  
490 stretched filopodia through transmembrane channels is sufficient for activation of  $\text{Ca}^{2+}$ -

491 sensitive calpain protease. By performing filopodia stretching experiments on cells  
492 expressing calpain activity sensor, we found that application of pulling force results in  
493 strong activation of calpain protease inside the stretched filopodia within a short time  
494 period of 1–2 minutes. Moreover, such calpain activation was completely abolished  
495 after removal of free  $\text{Ca}^{2+}$  from the cell culture medium, suggesting that the force-  
496 induced  $\text{Ca}^{2+}$  influx through filopodial transmembrane  $\text{Ca}^{2+}$  channels is absolutely  
497 necessary for it. These results are in good agreement with previous experimental studies  
498 showing that elevation of the intracellular  $\text{Ca}^{2+}$  level leads to a rapid activation of  
499 calpain protease within a short time period of 30–60 s, which results in degradation of  
500 the calpain target proteins within the next 1–2 minutes (65, 66).

501 Interestingly, previous studies show that  $\mu$ - and m-calpain sensitivity to  $\text{Ca}^{2+}$  is  
502 strongly enhanced in the presence of PIP2 phospholipids *in vivo* (65, 67). It is also  
503 known that filopodia formation is typically initiated on PIP2 lipid rafts, which are  
504 required for binding of several essential filopodial proteins such as IRSp53 and  
505 Ena/VASP (2). Thus, filopodia are likely to be enriched with PIP2 phospholipids, which  
506 would explain high sensitivity of calpain protease to the force-induced  $\text{Ca}^{2+}$  influx into  
507 stretched filopodia observed in our study.

508 What could be possible biological functions of the force-induced  $\text{Ca}^{2+}$  influx into  
509 filopodia? One simple consideration is based on known targets of calpain proteolytic  
510 activity. Calpain cleaves talin (68) and therefore can in principle release the integrin  
511 talin-mediated adhesion of filopodia tips. Thus, if a filopodium is pulled via integrin-  
512 mediated contact, activation of calpain by  $\text{Ca}^{2+}$  could disrupt such a contact and release  
513 the tension that may potentially harm the filopodium and/or cell, consistently with the  
514 role of L-type  $\text{Ca}^{2+}$  channels in maintenance of filopodia integrity (29). In this  
515 connection, it is also interesting that an “exceptional” cell type, HeLa-JW, in which  
516 filopodia stretching induced very weak, if any,  $\text{Ca}^{2+}$  entry, demonstrates another  
517 response to mechanical tension – force-induced elongation of filopodia (7) that can also  
518 prevent filopodia rupture.

519 Calpain, however, can produce more complex effects on integrin adhesions rather  
520 than simply disrupt them. In particular, in growth cone filopodia, calpain-mediated  
521 cleavage of talin and FAK results in inhibition of both adhesions’ formation and their  
522 disassembly. This affects axon growth characteristics, such as repulsive turning and  
523 response to the substrate rigidity (69). Moreover, besides calpain,  $\text{Ca}^{2+}$  influx can  
524 regulate other local targets in filopodia, including calcineurin phosphatase, which is  
525 involved in a variety of signaling pathways (70). Thus, mechanically induced  $\text{Ca}^{2+}$   
526 influx can trigger different signaling cascades, via calpain and other targets, which  
527 could affect growth and adhesion of filopodia. In addition, we have found that in some  
528 cases  $\text{Ca}^{2+}$  signal can spread from filopodia to the cell body. Such signal propagation  
529 and its possible function deserves further investigation.

530 In summary, our study clearly demonstrates that  $\text{Ca}^{2+}$  influx into filopodia is a basic  
531 signaling response to physiological level of tensile forces applied to filopodia tips and  
532 therefore can be used by cells in different processes of mechano-orientation and motion

533 guidance, involving response to the matrix rigidity and topography. Moreover, we  
534 established that in cells of different types such response is mediated by L-type  $\text{Ca}^{2+}$   
535 channels rather than known mechanosensing  $\text{Ca}^{2+}$  channels like TRPV4, and Piezo 1  
536 and Piezo 2. Involvement of L-type  $\text{Ca}^{2+}$  channels in different type of mechanosensory  
537 mechanisms is an interesting avenue for the future studies.

538

## 539 **Materials and Methods**

### 540 **Cell lines, plasmids and inhibitors:**

541 Wild-type HEK-293T, MCF-7 and A2058 cells used in this study were obtained from  
542 ATCC company. HEK-293T Piezo1 KO stable cell line was kindly provided by the  
543 Boris Martinac's and Ardem Patapoutian's laboratories. HeLa-JW, a subline of a HeLa  
544 cervical carcinoma cell line derived in the laboratory of J. Willams (Carnegie-Mellon  
545 University, USA) on the basis of better attachment to plastic dishes (71), was obtained  
546 from the laboratory of B. Geiger (72).

547 The calcium sensor (pGP-CMV-GCaMP6f) used in this study was a gift from  
548 Douglas Kim & GENIE Project (Addgene plasmid # 40755;  
549 <http://n2t.net/addgene:40755> ; RRID:Addgene\_40755). pCMV-calpainsensor plasmid  
550 was a gift from Isabelle Richard (Addgene plasmid # 36182;  
551 <http://n2t.net/addgene:36182> ; RRID:Addgene\_36182). The plasmid containing the  $\alpha_{1C}$   
552 subunit (Cav1.2) of L-type  $\text{Ca}^{2+}$  channels was a gift from Diane Lipscombe (Addgene  
553 plasmid # 26572; <http://n2t.net/addgene:26572> ; RRID:Addgene\_26572). The mApple-  
554 myosin X was subcloned by the Protein Cloning and Expression Core facility of the  
555 MBI.

556 All cell lines were cultured in DMEM media supplemented with sodium pyruvate  
557 and 10% Hi-FBS (Life Technologies). To express protein constructs in living cells,  
558 jetPrime transfection reagent was used to introduce plasmids into the cells a day before  
559 the experiment. Four hours later after the transfection, cells were re-plated onto 4-well  
560 glass bottom dishes coated with fibronectin at a concentration of 10  $\mu\text{g}/\text{ml}$ . After that  
561 cells were incubated overnight in DMEM media, allowing them to firmly attach to the  
562 surface of the fibronectin-coated dishes. On the day of the experiment, the cell culture  
563 medium was switched to 1X Ringer's balanced salt buffer supplemented with 11mM  
564 glucose. pH level of all the cell culture media used in experiments was in 7.4–7.6 range.

565 For sarco/endoplasmic reticulum  $\text{Ca}^{2+}$ -ATPase (SERCA) inhibition studies, cells  
566 were treated with 1  $\mu\text{M}$  thapsigargin (abcam, ab120286) for 1 hr before the experiment.  
567 For TRPV4  $\text{Ca}^{2+}$  channel inhibition studies, 1  $\mu\text{M}$  GSK2193874 (Sigma-Aldrich,  
568 SML0942) was added to cells 30 min prior the experiment. Inhibition of voltage-gated  
569 L-type  $\text{Ca}^{2+}$  channels was done by introduction of 10  $\mu\text{M}$  amlodipine besylate (Tocris,  
570 catalog # 2571) into the cell culture medium 30 min before the experiment. For  
571 inhibition of voltage-gated  $\text{Na}^{+}$  channels, cells were pre-treated with 2 mM lidocaine  
572 (Sigma-Aldrich, L7757) for 30 min prior the start of the experiment. Finally, inhibition  
573 of calpain protease was achieved by adding 100  $\mu\text{M}$  ALLN (Peptide International, IAL-

574 3671-PI) to the cell culture medium before the experiment. In all experiments,  
575 inhibitors remained in the medium during the entire observation period.

576

### 577 **Optical tweezers experiments**

578 Detailed description of the optical tweezers setup and experimental procedures can be  
579 found in ref. (7). Calibration of the optical trap stiffness,  $k$ , was done by using the  
580 viscous flow calibration method (73). The measured value of  $k$  was  $0.51 \pm 0.07$  pN/nm.  
581 The force,  $F$ , applied to stretched filopodia in optical tweezers experiments was  
582 obtained by using the formula:  $F = k\Delta x$ , where  $k$  is the stiffness of the optical trap, and  
583  $\Delta x$  is the measured deviation of the bead center from the axis of the optical trap (see  
584 Figure 1C).

585

### 586 **RT-qPCR experiments**

587 For quantification of the transcription level of Piezo 2, CACNA1C and GAPDH genes,  
588 total RNA of cultured HEK-293 Piezo 1 KO cells were extracted by using Qiagen  
589 RNeasy Micro Kit (Cat No./ID: 74004). Then 5  $\mu$ g of the extracted RNA was reversely  
590 transcribed by utilizing Tetro cDNA Synthesis Kit (Bioline, BIO-65043) and random  
591 Hexamer Primer according to the manufacturer's protocols. The RT-qPCR reactions  
592 were carried out on a Biorad C1000 thermo cycler by using custom-synthesized Taqman  
593 Probes for Piezo 2 (Hs00926218\_m1), CACNA1C (Hs00167681\_m1) and GAPDH  
594 (Hs99999905\_m1) genes, and Taqman Gene Expression Mastermix from Thermofisher.  
595 Obtained  $C_q$  values of the RT-qPCR runs were then used for analysis.

596

### 597 **Data processing**

598 To quantify intensities of the filopodia fluorescent signals coming from  $Ca^{2+}$  sensor,  
599 GCaMP6f, the "plot profile" tool of ImageJ program was used in the study. For this  
600 purpose, in each movie the axis of a mechanically stretched filopodium was selected as  
601 a contour along which intensity of the signal was measured. To prevent distortion of the  
602 signal by the background noise, the average noise level (which was typically  $< 0.3$  a.u.)  
603 was subtracted from each frame of the collected experimental movies. Furthermore, to  
604 ensure consistency of the measurements the following steps were taken during filopodia  
605 stretching experiments. First, we studied only those filopodia, which were lying on the  
606 horizontal surface of a glass coverslip. As filopodia are rather thin membrane  
607 protrusions (typical diameter  $< 500$ nm), this makes it possible to image a whole  
608 filopodium in a single Z stack. Next, during experiments, Z-axis drift of the focal plane  
609 of the microscope was minimized by monitoring and compensating the deviation of the  
610 imaging plane from the position corresponding to the sharpest filopodia contrast in the  
611 bright field (see, for example, Figure S3A). This allowed us to eliminate even small  
612 drifts along Z-axis of the microscope ( $\sim 200$  nm) as the filopodia bright field image has  
613 strong sensitivity on the change in Z-position of the microscope focal plane.

614 Experimental measurements indicate that by using such a compensation mechanism,  
615 all of the changes in the intensity of  $\text{Ca}^{2+}$  sensor in the filopodium shaft due to the focal  
616 plane drift along Z-axis direction can be reduced to a very low level of  $\leq 1.5\text{-}2$  a.u. over  
617 an experimentally relevant timescale of several minutes. As in all of the experiments  
618 with mechanically stretched filopodia the average signal intensity upon  $\text{Ca}^{2+}$  influx  
619 activation was typically  $> 10$  a.u., it can be concluded that the relative error in intensity  
620 measurements due to the microscope focal plane movement was  $\leq 15\%$ . This makes it  
621 possible to accurately quantify the role of extracellular forces in activation of  $\text{Ca}^{2+}$   
622 influx into mechanically stretched filopodia.

623 As for X and/or Y microscope stage movements that were necessary to generate a  
624 pulling force on filopodia, to minimize potential measurement errors that may arise  
625 from the horizontal movements, we selected a region of interest (ROI) of 50 pixels  
626 around filopodia contour by setting the line width = 50 pixels in the “plot profile” tool  
627 of ImageJ, and ensured that filopodia remained within the monitored ROI during the  
628 whole process of stretching, see Figure S3B. This method makes it possible to  
629 accurately quantify intensity profiles of filopodia independently of the microscope  
630 stage movements in both X and Y directions.

631 Finally, in order to eliminate potential bias in data processing, all of the filopodial  
632  $\text{Ca}^{2+}$  sensor signals were normalized by the average intensity of a cell cytoplasmic  
633 region of  $10\text{-}20\ \mu\text{m}^2$  size that was measured prior to filopodia stimulation by force, see  
634 Figure S3B.

635

636 **Data availability.** All study data are included in this article and SI Appendix.

637

### 638 **Acknowledgements**

639 We would like to thank Dr. Naila Omar Khayyam Alieva (IMCB, A\*STAR, Singapore),  
640 Dr. Kate Poole (UNSW, Australia) and Dr. Johanna Ivaska (University of Turku,  
641 Finland) for encouraging and productive discussions. We also thank Dr. F. Margadant,  
642 Peng Qiwen, Liu Jun, Ong Hui Ting, Bi Feng and Mak Kah Jun (MBI Microscopy Core  
643 facility), and Dr. Virgile Viasnoff for their kind help with the optical tweezers. The  
644 research was funded by the National Research Foundation (NRF), Prime Minister's  
645 Office, Singapore under its NRF Investigatorship Programme (NRF Investigatorship  
646 Award No. NRF-NRFI2016-03, to J.Y.), the National Research Foundation, Prime  
647 Minister's Office, Singapore and the Ministry of Education under the Research Centres  
648 of Excellence programme (to J.Y., M.P.S., A.D.B.), Singapore Ministry of Education  
649 Academic Research Fund Tier 3 (MOE2016-T3-1-002 to J.Y., M.P.S., A.D.B., in part),  
650 and by the Singapore Ministry of Education Academic Research Fund Tier 2  
651 (MOE2018-T2-2-138 to A.D.B.).

652

### 653 **Author contributions**

654 A.K.E. and M.Y. designed the study and performed the experiments; A.K.E. analyzed  
655 the data; A.K.E., M.Y. and J.Y. interpreted the data. A.K.E., M.Y. and J.Y. wrote the  
656 paper; M.P.S., A.D.B. and B.M. provided cell lines and plasmids as well as helpful  
657 insights into the studied molecular systems; A.K.E. and J.Y. supervised the research.

658

#### 659 **Competing financial interests**

660 The authors declare no competing financial interests.

661

#### 662 **References**

- 663 1. Mattila PK & Lappalainen P (2008) Filopodia: molecular architecture and cellular  
664 functions. *Nat. Rev. Mol. Cell Biol.* 9:446-454.
- 665 2. Heckman CA & Plummer HK, III (2013) Filopodia as sensors. *Cell. Signal.*  
666 25:2298-2311.
- 667 3. Jacquemet G, Hamidi H, & Ivaska J (2015) Filopodia in cell adhesion, 3D  
668 migration and cancer cell invasion. *Curr. Opin. Cell Biol.* 36:23-31.
- 669 4. Prols F, Sagar, & Scaal M (2016) Signaling filopodia in vertebrate embryonic  
670 development. *Cell. Mol. Life Sci.* 73:961-974.
- 671 5. Bryant PJ (1999) Filopodia: fickle fingers of cell fate? *Curr. Biol.* 9:R655-657.
- 672 6. Wong S, Guo W-H, & Wang Y-L (2014) Fibroblasts probe substrate rigidity with  
673 filopodia extensions before occupying an area. *Proc. Natl. Acad. Sci. USA*  
674 111:17176-17181.
- 675 7. Alieva NO, *et al.* (2019) Myosin IIA and formin dependent mechanosensitivity of  
676 filopodia adhesion. *Nat. Commun.* 10:3593.
- 677 8. Faix J, Breitsprecher D, Stradal TEB, & Rottner K (2009) Filopodia: complex  
678 models for simple rods. *Int. J. Biochem. Cell Biol.* 41:1656-1664.
- 679 9. Vignjevic D, *et al.* (2006) Role of fascin in filopodial protrusion. *J. Cell Biol.*  
680 174:863-875.
- 681 10. Jaiswal R, *et al.* (2013) The formin Daam1 and fascin directly collaborate to  
682 promote filopodia formation. *Curr. Biol.* 23:1373-1379.
- 683 11. Pellegrin S & Mellor H (2005) The Rho family GTPase Rif induces filopodia  
684 through mDia2. *Curr. Biol.* 15:129-133.
- 685 12. Block J, *et al.* (2008) Filopodia formation induced by active mDia2/Drf3. *J.*  
686 *Microsc.* 231:506-517.
- 687 13. Block J, *et al.* (2012) FMNL2 drives actin-based protrusion and migration  
688 downstream of Cdc42. *Curr. Biol.* 22:1005-1012.
- 689 14. Harris ES, Gauvin TJ, Heimsath EG, & Higgs HN (2010) Assembly of filopodia  
690 by the formin FRL2 (FMNL3). *Cytoskeleton (Hoboken)* 67:755-772.
- 691 15. Young LE, Heimsath EG, & Higgs HN (2015) Cell type-dependent mechanisms  
692 for formin-mediated assembly of filopodia. *Mol. Biol. Cell* 26:4646-4659.
- 693 16. Schirenbeck A, Arasada R, Bretschneider T, Schleicher M, & Faix J (2005)

- 694 Formins and VASPs may co-operate in the formation of filopodia. *Biochem. Soc.*  
695 *Trans.* 33:1256-1259.
- 696 17. Applewhite DA, *et al.* (2007) Ena/VASP proteins have an anti-capping independent  
697 function in filopodia formation. *Mol. Biol. Cell* 18:2579-2591.
- 698 18. Barzik M, McClain LM, Gupton SL, & Gertler FB (2014) Ena/VASP regulates  
699 mDia2-initiated filopodial length, dynamics, and function. *Mol. Biol. Cell* 25:2604-  
700 2619.
- 701 19. Sydor AM, Su AL, Wang F-S, Xu A, & Jay DG (1996) Talin and vinculin play  
702 distinct roles in filopodial motility in the neuronal growth cone. *J. Cell Biol.*  
703 134:1197-1207.
- 704 20. Lagarrigue F, *et al.* (2015) A RIAM/lamellipodin–talin–integrin complex forms the  
705 tip of sticky fingers that guide cell migration. *Nat. Commun.* 6:8492.
- 706 21. Lafuente EM, *et al.* (2004) RIAM, an Ena/VASP and profilin ligand, interacts with  
707 Rap1-GTP and mediates Rap1-induced adhesion. *Dev. Cell* 7:585-595.
- 708 22. Goult BT, Yan J, & Schwartz MA (2018) Talin as a mechanosensitive signaling  
709 hub. *J. Cell Biol.* 217:3776-3784.
- 710 23. Zhang H, *et al.* (2004) Myosin-X provides a motor-based link between integrins  
711 and the cytoskeleton. *Nat. Cell Biol.* 6:523-531.
- 712 24. Sousa AD & Cheney RE (2005) Myosin-X: a molecular motor at the cell's  
713 fingertips. *Trends Cell Biol.* 15:533-539.
- 714 25. Bohil AB, Robertson BW, & Cheney RE (2006) Myosin-X is a molecular motor  
715 that functions in filopodia formation. *Proc. Natl. Acad. Sci. USA* 103:12411-12416.
- 716 26. Kerber ML & Cheney RE (2011) Myosin-X: a MyTH-FERM myosin at the tips of  
717 filopodia. *J. Cell Sci.* 124:3733-3741.
- 718 27. Miihkinen M, *et al.* (2020) Myosin-X is required for integrin activation at filopodia  
719 tips. *bioRxiv*:<https://doi.org/10.1101/2020.1105.1105.078733>.
- 720 28. Moore SW, Biais N, & Sheetz MP (2009) Traction on immobilized netrin-1 is  
721 sufficient to reorient axons. *Science* 325:166.
- 722 29. Jacquemet G, *et al.* (2016) L-type calcium channels regulate filopodia stability and  
723 cancer cell invasion downstream of integrin signalling. *Nat. Commun.* 7:13297.
- 724 30. Gomez TM, Robles E, Poo M-m, & Spit NC (2001) Filopodial calcium transients  
725 promote substrate-dependent growth cone turning. *Science* 291:1983-1987.
- 726 31. Yin J & Kuebler WM (2010) Mechanotransduction by TRP channels: general  
727 concepts and specific role in the vasculature. *Cell Biochem. Biophys.* 56:1-18.
- 728 32. Murthy SE, Dubin AE, & Patapoutian A (2017) Piezos thrive under pressure:  
729 mechanically activated ion channels in health and disease. *Nat. Rev. Mol. Cell Biol.*  
730 18:771-783.
- 731 33. Furukawa T (2013) Types of voltage-gated calcium channels: molecular and  
732 electrophysiological views. *Curr. Hypertens. Rev.* 9:170-181.
- 733 34. Franco SJ & Huttenlocher A (2005) Regulating cell migration: calpains make the  
734 cut. *J. Cell Sci.* 118:3829-3838.
- 735 35. Courson DS & Cheney RE (2015) Myosin-X and disease. *Exp. Cell Res.* 334:10-  
736 15.
- 737 36. Arias-Romero LE & Chernoff J (2013) Targeting Cdc42 in cancer. *Expert Opin.*

- 738 *Ther. Targets* 17:1263-1273.
- 739 37. Helassa N, Podor B, Fine A, & Török K (2016) Design and mechanistic insight  
740 into ultrafast calcium indicators for monitoring intracellular calcium dynamics. *Sci.*  
741 *Rep.* 6:38276.
- 742 38. Bornschlögl T, *et al.* (2013) Filopodial retraction force is generated by cortical  
743 actin dynamics and controlled by reversible tethering at the tip. *Proc. Natl. Acad.*  
744 *Sci. USA* 110:18928-18933.
- 745 39. Coste B, *et al.* (2010) Piezo1 and Piezo2 are essential components of distinct  
746 mechanically activated cation channels. *Science* 330:55.
- 747 40. Uhlén M, *et al.* (2015) Tissue-based map of the human proteome. *Science*  
748 347:1260419.
- 749 41. Uhlen M, *et al.* (2017) A pathology atlas of the human cancer transcriptome.  
750 *Science* 357:eaan2507.
- 751 42. Mueller SC, Kelly T, Dai M, Dai H, & Chen W-T (1989) Dynamic cytoskeleton-  
752 integrin associations induced by cell binding to immobilized fibronectin. *J. Cell*  
753 *Biol.* 109:3455-3464.
- 754 43. Miyamoto S, Akiyama SK, & Yamada KM (1995) Synergistic roles for receptor  
755 occupancy and aggregation in integrin transmembrane function. *Science* 267:883-  
756 885.
- 757 44. Mochizuki T, *et al.* (2009) The TRPV4 cation channel mediates stretch-evoked  
758 Ca<sup>2+</sup> influx and ATP release in primary urothelial cell cultures. *J. Biol. Chem.*  
759 284:21257-21264.
- 760 45. Loukin S, Zhou X, Su Z, Saimi Y, & Kung C (2010) Wild-type and brachyolmia-  
761 causing mutant TRPV4 channels respond directly to stretch force. *J. Biol. Chem.*  
762 285:27176-27181.
- 763 46. Cheung M, *et al.* (2017) Discovery of GSK2193874: an orally active, potent, and  
764 selective blocker of Transient Receptor Potential Vanilloid 4. *ACS Med. Chem. Lett.*  
765 8:549-554.
- 766 47. Nikolaev YA, *et al.* (2019) Mammalian TRP ion channels are insensitive to  
767 membrane stretch. *J. Cell Sci.* 132:jcs238360.
- 768 48. Lyford GL, *et al.* (2002)  $\alpha_{1C}$  (Cav1.2) L-type calcium channel mediates  
769 mechanosensitive calcium regulation. *Am. J. Physiol. Cell Physiol.* 283:C1001-  
770 C1008.
- 771 49. Park SW, *et al.* (2017) Caveolar remodeling is a critical mechanotransduction  
772 mechanism of the stretch-induced L-type Ca<sup>2+</sup> channel activation in vascular  
773 myocytes. *Pflugers Arch.* 469:829-842.
- 774 50. Takahashi K, *et al.* (2019) L-type calcium channel modulates mechanosensitivity  
775 of the cardiomyocyte cell line H9c2. *Cell Calcium* 79:68-74.
- 776 51. Kwan YW, Bangalore R, Lakitsh M, Glossmann H, & Kass RS (1995) Inhibition  
777 of cardiac L-type calcium channels by quaternary amlodipine: implications for  
778 pharmacokinetics and access to dihydropyridine binding site. *J. Mol. Cell Cardiol.*  
779 27:253-262.
- 780 52. Sheets MF & Hanck DA (2007) Outward stabilization of the S4 segments in  
781 domains III and IV enhances lidocaine block of sodium channels. *J. Physiol.*



- 782 582:317-334.
- 783 53. Robles E, Huttenlocher A, & Gomez TM (2003) Filopodial calcium transients  
784 regulate growth cone motility and guidance through local activation of calpain.  
785 *Neuron* 38:597-609.
- 786 54. Stockholm D, *et al.* (2005) Imaging calpain protease activity by multiphoton FRET  
787 in living mice. *J. Mol. Biol.* 346:215-222.
- 788 55. Sasaki T, *et al.* (1990) Inhibitory effect of di- and tripeptidyl aldehydes on calpains  
789 and cathepsins. *J. Enzyme Inhib.* 3:195-201.
- 790 56. Xu J, *et al.* (2018) GPR68 senses flow and is essential for vascular physiology. *Cell*  
791 173:762-775.
- 792 57. Martinac B (2004) Mechanosensitive ion channels: molecules of  
793 mechanotransduction. *J. Cell Sci.* 117:2449-2460.
- 794 58. del Rio A, *et al.* (2009) Stretching single talin rod molecules activates vinculin  
795 binding. *Science* 323:638-641.
- 796 59. Jegou A, Carlier M-F, & Romet-Lemonne G (2013) Formin mDial senses and  
797 generates mechanical forces on actin filaments. *Nature Comm.* 4:1883.
- 798 60. Yao M, *et al.* (2014) Mechanical activation of vinculin binding to talin locks talin  
799 in an unfolded conformation. *Sci. Rep.* 4:4610.
- 800 61. Yao M, *et al.* (2016) The mechanical response of talin. *Nat. Commun.* 7:11966.
- 801 62. Yu M, *et al.* (2017) mDial senses both force and torque during F-actin filaments  
802 polymerization. *Submitted* 8:1650.
- 803 63. Yu M, *et al.* (2018) Effects of mechanical stimuli on profilin- and formin-mediated  
804 actin polymerization. *Nano Lett.* 18:5239-5247.
- 805 64. Kubota H, *et al.* (2018) Processive nanosteping of formin mDial loosely coupled  
806 with actin polymerization. *Nano Lett.* 18:6617-6624.
- 807 65. Saido TC, Shibata M, Takenawa T, Murofushi H, & Suzuki K (1992) Positive  
808 regulation of m-calpain action by polyphosphoinositides. *J. Biol. Chem.*  
809 267:24585-24590.
- 810 66. Schoenwaelder SM, Yuan Y, Cooray P, Salem HH, & Jackson SP (1997) Calpain  
811 cleavage of focal adhesion proteins regulates the cytoskeletal attachment of  
812 integrin  $\alpha_{IIb}\beta_3$  (platelet glycoprotein IIb/IIIa) and the cellular retraction of fibrin  
813 clots. *J. Biol. Chem.* 272:1694-1702.
- 814 67. Shao H, *et al.* (2006) Spatial localization of m-calpain to the plasma membrane by  
815 phosphoinositide biphosphate binding during epidermal growth factor receptor-  
816 mediated activation. *Mol. Cell. Biol.* 26:5481-5496.
- 817 68. Franco SJ, *et al.* (2004) Calpain-mediated proteolysis of talin regulates adhesion  
818 dynamics. *Nat. Cell Biol.* 6:977-983.
- 819 69. Kerstein PC, Patel KM, & Gomez TM (2017) Calpain-mediated proteolysis of talin  
820 and FAK regulates adhesion dynamics necessary for axon guidance. *J. Neurosci.*  
821 37:1568-1580.
- 822 70. Chang HY, *et al.* (1995) Asymmetric retraction of growth cone filopodia following  
823 focal inactivation of calcineurin. *Nature* 376:686-690.
- 824 71. Bai M, Harfe B, & Freimuth P (1993) Mutations that alter an Arg-Gly-Asp (RGD)  
825 sequence in the adenovirus type 2 penton base protein abolish its cell-rounding

- 826 activity and delay virus reproduction in flat cells. *J. Virol.* 67:5198-5205.
- 827 72. Paran Y, *et al.* (2006) Development and application of automatic high-resolution  
828 light microscopy for cell-based screens. *Methods Enzymol.* 414:228-247.
- 829 73. Perkins TT (2009) Optical traps for single molecule biophysics: a primer. *Laser &*  
830 *Photon. Rev.* 3:203-220.

831 **Supplementary figures**

832

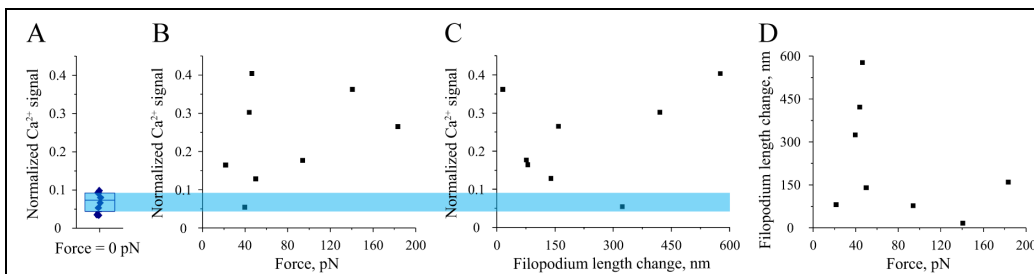

**Figure S1. A.** Normalized maximum intensity of the Ca<sup>2+</sup> sensor measured in filopodia attached to fibronectin-covered microbeads in the absence of mechanical load (F = 0 pN). **B.** Normalized maximum intensity of the Ca<sup>2+</sup> sensor vs mechanical load measured in filopodia stretching experiments performed on WT HEK-293 cells. **C.** Normalized maximum intensity of the Ca<sup>2+</sup> sensor vs force-induced filopodia extensions (i.e., strain) measured in the same experiments as in panel A. **D.** Filopodia extensions plotted vs applied mechanical load. Data points shown in the graphs A-D were collected at the moment of appearance of the first force-induced Ca<sup>2+</sup> signal in pulled filopodia. In panels A-C, intensity of the Ca<sup>2+</sup> sensor fluorescent signal, which was observed in the filopodia shafts (excluding filopodia tip regions), is normalized to the intensity of the Ca<sup>2+</sup> sensor in the cell cytoplasm measured prior to filopodia stretching (if any), see more details in Method section. Blue shaded area in panels A-C shows the range of Ca<sup>2+</sup> signal intensities corresponding to panel A, which were measured in the absence of mechanical load.

833

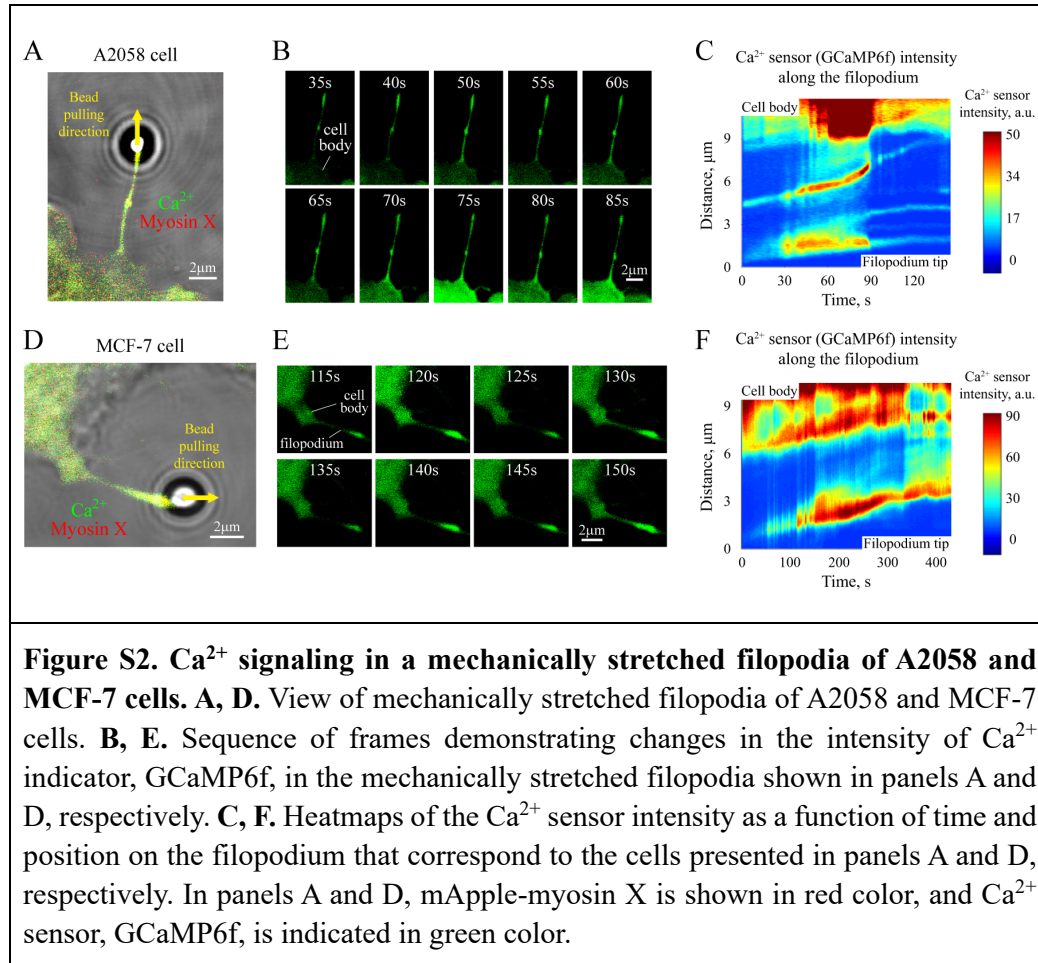

834

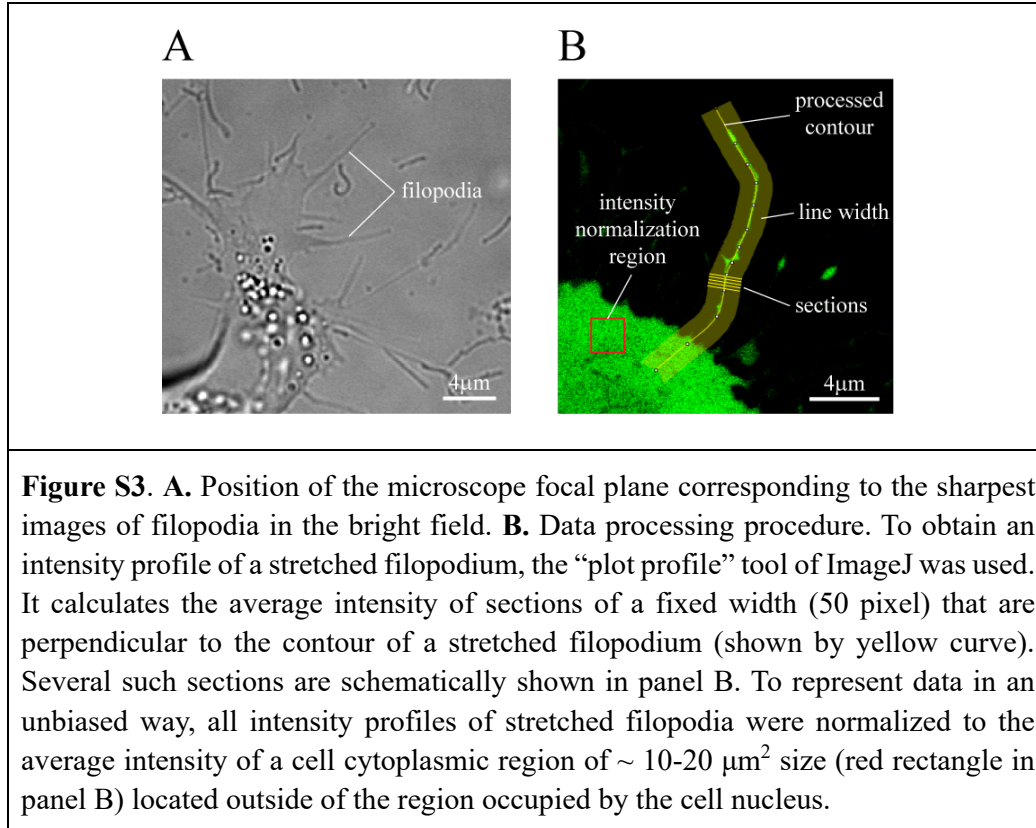

835

| Gene            | C <sub>q</sub> , sample 1 | C <sub>q</sub> , sample 2 | C <sub>q</sub> , sample 3 |
|-----------------|---------------------------|---------------------------|---------------------------|
| GAPDH (control) | 20.43                     | 20.21                     | 20.46                     |
| Piezo 2         | 37.11                     | 35.72                     | 36.10                     |
| CACNA1C         | 32.41                     | 32.18                     | 32.09                     |

836

837 **Table T1.** C<sub>q</sub> values indicating the relative mRNA levels of GAPDH housekeeping  
838 gene (control), Piezo 2 gene, and CACNA1C gene (encodes the pore-forming  $\alpha_{1C}$   
839 subunit of L-type Ca<sup>2+</sup> channels) measured in qPCR assay, which was done for three  
840 different samples prepared from HEK-293 Piezo 1 KO cells.

841

842 **Supplementary movies**

843

844 **Movie 1**

845 The movie shows a fibronectin-coated microbead attached to the surface of a force-  
846 unloaded (i.e., optical trap is off) myosin X-induced filopodium of a HEK-293 cell. The  
847 bead demonstrates persistent movement along the filopodium towards the cell body,  
848 with no  $\text{Ca}^{2+}$  signal being observed inside the bead-attached filopodium. The left panel  
849 in the movie displays composite frames that combine the bright field, green (GCaMP6f  
850  $\text{Ca}^{2+}$  sensor) and red (mApple-myosin X) channels; whereas, the right panel  
851 demonstrates only the green channel (GCaMP6f  $\text{Ca}^{2+}$  sensor). The duration of the  
852 original video clip is 4 min 22 s. The movie was recorded at 2 fps rate and displayed at  
853 75 fps.

854

855 **Movies 2A,B**

856 The movies show a mechanically stretched myosin X-induced filopodium of a wild-  
857 type HEK-293 cell. The force was applied to the tip region of the filopodium by using  
858 an optically trapped fibronectin-coated microbead (see Figure 1C for details). Strong  
859  $\text{Ca}^{2+}$  signal produced by the stretched filopodium in response to the applied mechanical  
860 load can be clearly seen in both movies. The left panel in Movie 2A displays composite  
861 frames that combine the bright field, green (GCaMP6f  $\text{Ca}^{2+}$  sensor) and red (mApple-  
862 myosin X) channels; whereas, the right panel demonstrates only the green channel  
863 (GCaMP6f  $\text{Ca}^{2+}$  sensor). Original duration of Movie 2A is 5 min 30 s. The movie was  
864 recorded at 2 fps rate and displayed at 75 fps. As for Movie 2B, it demonstrates a set of  
865 frames from Movie 2A corresponding to the moment of the  $\text{Ca}^{2+}$  signal appearance in  
866 the stretched filopodium in slow motion (displayed at 5 fps rate).

867

868 **Movie 3**

869 The movie shows a mechanically stretched filopodium induced by constitutively active  
870 GFP-Cdc42 (Q61L) in a wild-type HEK-293 cell. The force was applied to the tip of  
871 the filopodium by using an optically trapped fibronectin-coated microbead. Clearly  
872 visible  $\text{Ca}^{2+}$  signal inside the stretched filopodium can be seen in the movie above the  
873 background level generated by GFP-Cdc42. The left panel in the movie displays  
874 composite frames that combine the bright field and the green channel (GCaMP6f  $\text{Ca}^{2+}$   
875 sensor + GFP-Cdc42); whereas, the right panel demonstrates only the green channel  
876 (GCaMP6f  $\text{Ca}^{2+}$  sensor + GFP-Cdc42). The duration of the original video clip is 7 min  
877 16 s. The movie was recorded at 2 fps rate and displayed at 120 fps.

878

879 **Movie 4**

880 The movie shows a mechanically stretched myosin X-induced filopodium of a HEK-  
881 293 Piezo 1 KO cell. The force was applied to the tip region of the filopodium by using  
882 an optically trapped concanavalin A-coated microbead. Strong oscillating  $\text{Ca}^{2+}$  signal  
883 can be clearly seen in the movie inside the stretched filopodium. The left panel in the

884 movie displays composite frames that combine the bright field, green (GCaMP6f Ca<sup>2+</sup>  
885 sensor) and red (mApple-myosin X) channels; whereas, the right panel demonstrates  
886 only the green channel (GCaMP6f Ca<sup>2+</sup> sensor). The duration of the original video clip  
887 is 3 min 28 s. The movie was recorded at 2 fps rate and displayed at 60 fps.

888

#### 889 **Movies 5A,B**

890 The movies show a mechanically stretched myosin X-induced filopodium of a HEK-  
891 293 Piezo 1 KO cell. The force was applied to the tip of the filopodium by using an  
892 optically trapped concanavalin A-coated microbead. Activation of the cell cortex at the  
893 base of the stretched filopodium caused by increase in the intra-filopodial Ca<sup>2+</sup> level  
894 can be clearly seen in Movie 5A at T = 472 s. The left panel in Movie 5A displays  
895 composite frames that combine the bright field, green (GCaMP6f Ca<sup>2+</sup> sensor) and red  
896 (mApple-myosin X) channels; whereas, the right panel demonstrates only the green  
897 channel (GCaMP6f Ca<sup>2+</sup> sensor). The duration of the original video clip is 10 min 4 s.  
898 The movie was recorded at 2 fps rate and displayed at 120 fps. As for Movie 5B, it  
899 demonstrates a set of frames from Movie 5A corresponding to the moment of the cell  
900 cortex activation in slow motion (displayed at 10 fps rate).

901

#### 902 **Movie 6**

903 The movie shows a mechanically stretched myosin X-induced filopodium of a HEK-  
904 293 Piezo 1 KO cell in the presence of 1 μM thapsigargin (sarco/endoplasmic reticulum  
905 Ca<sup>2+</sup>-ATPase inhibitor) in the cell culture medium. The force was applied to the tip of  
906 the filopodium by using an optically trapped concanavalin A-coated microbead. Strong  
907 force-induced Ca<sup>2+</sup> signal can be clearly seen inside the stretched filopodium. The left  
908 panel in the movie displays composite frames that combine the bright field, green  
909 (GCaMP6f Ca<sup>2+</sup> sensor) and red (mApple-myosin X) channels; whereas, the right panel  
910 demonstrates only the green channel (GCaMP6f Ca<sup>2+</sup> sensor). The duration of the  
911 original video clip is 5 min 27 s. The movie was recorded at 2 fps rate and displayed at  
912 90 fps.

913

#### 914 **Movie 7**

915 The movie shows a mechanically stretched myosin X-induced filopodium of a HEK-  
916 293 Piezo 1 KO cell in Ca<sup>2+</sup>-free cell culture medium in the presence of 5 mM EGTA.  
917 The force was applied to the tip of the filopodium by using an optically trapped  
918 concanavalin A-coated microbead. As can be seen from the movie, presence of Ca<sup>2+</sup>-  
919 chelating EGTA in the medium completely abolishes Ca<sup>2+</sup> signals in the shaft of the  
920 mechanically stretched filopodium. The left panel in the movie displays composite  
921 frames that combine the bright field, green (GCaMP6f Ca<sup>2+</sup> sensor) and red (mApple-  
922 myosin X) channels; whereas, the right panel demonstrates only the green channel  
923 (GCaMP6f Ca<sup>2+</sup> sensor). The duration of the original video clip is 4 min 42 s. The movie  
924 was recorded at 2 fps rate and displayed at 75 fps.

925



926 **Movie 8**

927 The movie shows a mechanically stretched myosin X-induced filopodium of a HEK-  
928 293 Piezo 1 KO cell in the presence of 1  $\mu\text{M}$  GSK2193874 (TRPV4  $\text{Ca}^{2+}$  channel  
929 inhibitor) in the cell culture medium. The force was applied to the tip of the filopodium  
930 by using an optically trapped concanavalin A-coated microbead. Strong intra-filopodial  
931  $\text{Ca}^{2+}$  signal resulting in the global cell activation can be clearly seen in the movie. The  
932 left panel in the movie displays composite frames that combine the bright field, green  
933 (GCaMP6f  $\text{Ca}^{2+}$  sensor) and red (mApple-myosin X) channels; whereas, the right panel  
934 demonstrates only the green channel (GCaMP6f  $\text{Ca}^{2+}$  sensor). The duration of the  
935 original video clip is 2 min 0 s. The movie was recorded at 2 fps rate and displayed at  
936 30 fps.

937

938 **Movie 9**

939 The movie shows a mechanically stretched myosin X-induced filopodium of a HEK-  
940 293 Piezo 1 KO cell in the presence of 10  $\mu\text{M}$  amlodipine besylate (L-type  $\text{Ca}^{2+}$   
941 channels' inhibitor) in the cell culture medium. The force was applied to the tip of the  
942 filopodium by using an optically trapped concanavalin A-coated microbead. As can be  
943 seen from the movie, inhibition of L-type  $\text{Ca}^{2+}$  channels results in suppression of the  
944 force-induced  $\text{Ca}^{2+}$  signal in the stretched filopodium. This type of behavior was  
945 observed in  $\sim 44\%$  of the studied cells. The left panel in the movie displays composite  
946 frames that combine the bright field, green (GCaMP6f  $\text{Ca}^{2+}$  sensor) and red (mApple-  
947 myosin X) channels; whereas, the right panel demonstrates only the green channel  
948 (GCaMP6f  $\text{Ca}^{2+}$  sensor). The duration of the original video clip is 3 min 4 s. The movie  
949 was recorded at 2 fps rate and displayed at 45 fps.

950

951 **Movie 10**

952 The movie shows a mechanically stretched myosin X-induced filopodium of a HEK-  
953 293 Piezo 1 KO cell in the presence of 10  $\mu\text{M}$  amlodipine besylate (L-type  $\text{Ca}^{2+}$   
954 channels' inhibitor) in the cell culture medium. The force was applied to the tip of the  
955 filopodium by using an optically trapped concanavalin A-coated microbead. This video  
956 demonstrates an example of an amlodipine-treated cell which retained  $\text{Ca}^{2+}$  signaling  
957 in the mechanically stretched filopodium despite the presence of the L-type  $\text{Ca}^{2+}$   
958 channels' inhibitor in the cell culture medium. Such type of behavior was observed in  
959  $\sim 56\%$  of the treated cells. The left panel in the movie displays composite frames that  
960 combine the bright field, green (GCaMP6f  $\text{Ca}^{2+}$  sensor) and red (mApple-myosin X)  
961 channels; whereas, the right panel demonstrates only the green channel (GCaMP6f  $\text{Ca}^{2+}$   
962 sensor). The duration of the original video clip is 5 min 48 s. The movie was recorded  
963 at 2 fps rate and displayed at 90 fps.

964

965 **Movie 11**

966 The movie shows a mechanically stretched myosin X-induced filopodium of a wild-  
967 type HeLa-JW cell. The force was applied to the tip of the filopodium by using an  
968 optically trapped fibronectin-coated microbead. It can be seen from the movie that

969 mechanical stretching of the filopodium results in generation of a very weak intra-  
970 filopodial  $\text{Ca}^{2+}$  signal. The left panel in the movie displays composite frames that  
971 combine the bright field and the green channel (GCaMP6f  $\text{Ca}^{2+}$  sensor); whereas, the  
972 right panel demonstrates only the green channel (GCaMP6f  $\text{Ca}^{2+}$  sensor). The duration  
973 of the original video clip is 3 min 16 s. The movie was recorded at 2 fps rate and  
974 displayed at 45 fps.

975

#### 976 **Movie 12**

977 The movie shows a mechanically stretched myosin X-induced filopodium of a HeLa-  
978 JW cell transfected with a plasmid encoding the pore-forming  $\alpha_{1C}$  subunit (Cav1.2) of  
979 L-type  $\text{Ca}^{2+}$  channels. The force was applied to the tip of the filopodium by using an  
980 optically trapped fibronectin-coated microbead. Strong force-induced  $\text{Ca}^{2+}$  signal can  
981 be clearly seen inside the stretched filopodium in the movie. The left panel in the movie  
982 displays composite frames that combine the bright field and the green channel  
983 (GCaMP6f  $\text{Ca}^{2+}$  sensor); whereas, the right panel demonstrates only the green channel  
984 (GCaMP6f  $\text{Ca}^{2+}$  sensor). The duration of the original video clip is 2 min 58 s. The movie  
985 was recorded at 2 fps rate and displayed at 45 fps.
